# Supplementary material
Source: publisher figshare collection journal article supplement (https://acs.figshare.com/ndownloader/files/14038631)
Supplement: Supplementary file 1 [file 14038631]

## Sheet: acetylation_pos
metabolite1	metabolite2	+acetylation	metabolite1_rt	metabolite2_rt	+acetylation	note	Mass_1	ret_time_1	Mass_2	ret_time_1
gamma-Aminobutyric acid	4-Acetamidobutyric acid	1	gamma-Aminobutyric acid	4-Acetamidobutyric acid	1
N-Methylalanine	4-Acetamidobutyric acid	0	N-Methylalanine	4-Acetamidobutyric acid	0
3-Aminoisobutyric acid	4-Acetamidobutyric acid	0	3-Aminoisobutyric acid	4-Acetamidobutyric acid	0
N,N-Dimethylglycine	4-Acetamidobutyric acid	0	N,N-Dimethylglycine	4-Acetamidobutyric acid	0
Dioctyl Phthalate	Latanoprost	0
1,4-Cyclohexanedicarboxylic acid	4-Acetylbutyric acid	0
Butanoic acid	4-Acetylbutyric acid	1	Butanoic acid	4-Acetylbutyric acid	1
Isobutyric acid	4-Acetylbutyric acid	0	Isobutyric acid	4-Acetylbutyric acid	0	structural isomer
4-Hydroxymandelonitrile	(2-oxo-2,3-dihydro-1H-indol-3-yl)acetic acid	0	4-Hydroxymandelonitrile	(2-oxo-2,3-dihydro-1H-indol-3-yl)acetic acid	0
Imidazole	1-Acetylimidazole	1	Imidazole	1-Acetylimidazole	1
7,8-Dihydrobiopterin	1-Methyladenosine	0
Cotinine	1-Methyltryptophan	0
Serotonin	1-Methyltryptophan	0
Caffeine	2',3'-Dideoxyinosine	0
Secnidazole	2'-Deoxycytidine	0
7,8-Dihydrobiopterin	2'-O-Methyladenosine	0	7,8-Dihydrobiopterin	2'-O-Methyladenosine	0
6-Hydroxycaproic acid	2,3-Butanediol	0	6-Hydroxycaproic acid	2,3-Butanediol	0
2-Hydroxy-4-methylpentanoic acid	2,3-Butanediol	0	2-Hydroxy-4-methylpentanoic acid	2,3-Butanediol	0
3-Methylhistidine	2,3-Dideoxycytidine	0	3-Methylhistidine	2,3-Dideoxycytidine	0
N-Methylhistidine	2,3-Dideoxycytidine	0	N-Methylhistidine	2,3-Dideoxycytidine	0
alpha-Methylhistidine	2,3-Dideoxycytidine	0	alpha-Methylhistidine	2,3-Dideoxycytidine	0
Indole-3-pyruvic acid	2,8-Quinolinediol	0
N-Benzyloxycarbonylglycine	2-Amino-3-methoxybenzoic acid	0
Acetaminophen	2-Aminophenol	0
N-Methylanthranilic acid	2-Aminophenol	0
Acetominophen	2-Aminophenol	0
Coniferylaldehyde	2-Hydroxyacetophenone	0	Coniferylaldehyde	2-Hydroxyacetophenone	0
Alanine-2,3,3,3-d4	2-Propanamidoacetic acid	0	Alanine-2,3,3,3-d4	2-Propanamidoacetic acid	0
Alanine	2-Propanamidoacetic acid	0	Alanine	2-Propanamidoacetic acid	0
beta-Alanine	2-Propanamidoacetic acid	0	beta-Alanine	2-Propanamidoacetic acid	0
Lactamide	2-Propanamidoacetic acid	0
Methylglycinate	2-Propanamidoacetic acid	0
Sarcosine	2-Propanamidoacetic acid	0	Sarcosine	2-Propanamidoacetic acid	0
4-Aminobenzoic acid	2-Pyridone	0
N-Acetylleucine	Leucine	1	N-Acetylleucine	Leucine	1
N-Acetyl-leucine	Leucine	1	N-Acetyl-leucine	Leucine	1
N-Methyllysine	Ala-Ile	0	N-Methyllysine	Ala-Ile	0
Lysine	Ala-Val	0	Lysine	Ala-Val	0
3-Hydroxyproline	Alanine-2,3,3,3-d4	0	3-Hydroxyproline	Alanine-2,3,3,3-d4	0
Hydroxyproline	Alanine-2,3,3,3-d4	0
N-Acetylalanine	Alanine-2,3,3,3-d4	1	N-Acetylalanine	Alanine-2,3,3,3-d4	1
N-Methyllysine	Ala-Leu	0	N-Methyllysine	Ala-Leu	0
Creatinine	3-(1-Pyrazolyl)-alanine	0
N-Acetylhistidine	3-(1-Pyrazolyl)-alanine	0
Felbamate	3-Aminotyrosine	0	Felbamate	3-Aminotyrosine	0
Gly-Tyr	3-Aminotyrosine	0
4-Hydroxyhippuric acid	3-Hydroxyanthranilic acid	0
Pyrrole-2-carboxylic acid	3-Hydroxyanthranilic acid	0	Pyrrole-2-carboxylic acid	3-Hydroxyanthranilic acid	0
p-Coumaric acid	3-Hydroxybenzaldehyde	0
Dimethyl phthalate	3-Hydroxyphenylacetic acid	0	Dimethyl phthalate	3-Hydroxyphenylacetic acid	0
Ferulic acid	3-Hydroxyphenylacetic acid	0
Alanine	3-Hydroxyproline	0	Alanine	3-Hydroxyproline	0
beta-Alanine	3-Hydroxyproline	0	beta-Alanine	3-Hydroxyproline	0
Lactamide	3-Hydroxyproline	0
Methylglycinate	3-Hydroxyproline	0
Sarcosine	3-Hydroxyproline	0	Sarcosine	3-Hydroxyproline	0
3-Methyloxyindole	3-Indolepropionic acid	0
Indole-3-carbinol	3-Indolepropionic acid	0
Proline	3-Methylcrotonylglycine	0	Proline	3-Methylcrotonylglycine	0
2',3'-Dideoxycytidine	3-Methylhistidine	0	2',3'-Dideoxycytidine	3-Methylhistidine	0
Indole-3-propionic acid	3-Methyloxyindole	0
Acetaminophen	3-Pyridinemthanol	0	Acetaminophen	3-Pyridinemthanol	0
N-Methylanthranilic acid	3-Pyridinemthanol	0	N-Methylanthranilic acid	3-Pyridinemthanol	0
Acetominophen	3-Pyridinemthanol	0	Acetominophen	3-Pyridinemthanol	0
Ecgonine methylester	4-Aminomethylcyclohexanecarboxylic acid	0	Ecgonine methylester	4-Aminomethylcyclohexanecarboxylic acid	0
p-Coumaric acid	4-Hydroxybenzaldehyde	0
5-Aminosalicylic acid	4-Hydroxyhippuric acid	0
5-Hydroxy-3-indoleacetic acid	4-Hydroxymandelonitrile	0	5-Hydroxy-3-indoleacetic acid	4-Hydroxymandelonitrile	0
4-Methylumbelliferyl acetate	4-Methylumbelliferone	1	4-Methylumbelliferyl acetate	4-Methylumbelliferone	1
Choline [M]+	4-Trimethylammoniobutanoic acid	0
Pyrrole-2-carboxylic acid	5-Aminosalicylic acid	0	Pyrrole-2-carboxylic acid	5-Aminosalicylic acid	0
N-Isovalerylglycine	5-Aminovaleric acid	0	N-Isovalerylglycine	5-Aminovaleric acid	0
Trimethylamine N-oxide	5-Aminovaleric acid	0
Trimethylamine N-oxide	5-Aminovaleric acid	0
Melatonin	5-Methoxytryptamine	1	Melatonin	5-Methoxytryptamine	1
Nornicotine	5-Methoxytryptamine	0	Nornicotine	5-Methoxytryptamine	0
Gly-Pro	6-Hydroxycaproic acid	0
7,8-Dihydrobiopterin	6-Methyladenosine	0	7,8-Dihydrobiopterin	6-Methyladenosine	0
N6-Methyladenosine	7,8-Dihydrobiopterin	0	N6-Methyladenosine	7,8-Dihydrobiopterin	0
Medroxyprogesterone	Abietic acid	0	Medroxyprogesterone	Abietic acid	0
Actrarit	Acetaminophen	0
Phenylacetylglycine	Acetaminophen	0
4-Aminophenol	Acetaminophen	1					109.053	1.33938	151.063	1.373	retention time in negative mode: 1.270267
N-Methylanthranilic acid	Actrarit	0
Acetominophen	Actrarit	0
beta-N-Methylaminoalanine	Ala-Ala	0	beta-N-Methylaminoalanine	Ala-Ala	0
Hydroxyproline	Alanine	0
N-Acetylalanine	Alanine	1	N-Acetylalanine	Alanine	1
Phenmetrazine	Amphetamine	0	Phenmetrazine	Amphetamine	0
N-Acetyl-Asp-Glu	Asp-Glu	1	N-Acetyl-Asp-Glu	Asp-Glu	1
Felbamate	Asp-Phe	0
Gly-Tyr	Asp-Phe	0
Corydaline	Benactyzine	0	Corydaline	Benactyzine	0
Pyridine	Benzamide	0	Pyridine	Benzamide	0
p-Coumaric acid	Benzoic acid	0
Hydroxyproline	beta-Alanine	0
N-Acetylalanine	beta-Alanine	1	N-Acetylalanine	beta-Alanine	1
N-Isovalerylglycine	Betaine	0	N-Isovalerylglycine	Betaine	0
Trimethylamine N-oxide	Betaine	0
Trimethylamine N-oxide	Betaine	0
Tramadol	Capsaicin	0	Tramadol	Capsaicin	0
Rolipram	Cocaethylene	0
N-Acetylserotonin	Cotinine	0	N-Acetylserotonin	Cotinine	0
N-Acetyl-5-hydroxytryptamine	Cotinine	0	N-Acetyl-5-hydroxytryptamine	Cotinine	0
Histidine	Creatinine	0
N-Acetylcysteine	Cysteine	1	N-Acetylcysteine	Cysteine	1
N-Acetylcytidine	Cytarabine	0	N-Acetylcytidine	Cytarabine	0
N-Acetylcytidine	Cytidine	1	N-Acetylcytidine	Cytidine	1
P-Anisic acid	Dimethyl phthalate	0
Vanillin	Dimethyl phthalate	0	Vanillin	Dimethyl phthalate	0
p-Anisic acid	Dimethyl phthalate	0	p-Anisic acid	Dimethyl phthalate	0
Lobeline A	Donepezil	0
Lobeline	Donepezil	0
N-Methyltyrosine	Dopamine	0
Methyltyrosinate	Dopamine	0	Methyltyrosinate	Dopamine	0
Moxifloxacin	Enrofloxacin	0
gamma-Aminobutyric acid	Ethanolamine	0
N-Methylalanine	Ethanolamine	0
3-Aminoisobutyric acid	Ethanolamine	0
N,N-Dimethylglycine	Ethanolamine	0
P-Anisic acid	Ferulic acid	0
Vanillin	Ferulic acid	0
p-Anisic acid	Ferulic acid	0	p-Anisic acid	Ferulic acid	0
N-Acetylglucosamine	Galactosamine	0	N-Acetylglucosamine	Galactosamine	0	structural isomer
N-Acetylmannosamine	Galactosamine	0	N-Acetylmannosamine	Galactosamine	0	structural isomer
N-Isobutyrylglycine	gamma-Aminobutyric acid	0	N-Isobutyrylglycine	gamma-Aminobutyric acid	0
Butyrylglycine	gamma-Aminobutyric acid	0	Butyrylglycine	gamma-Aminobutyric acid	0
Meprobamate	gamma-Glutamylleucine	0
N-Acetylglutamic acid	Glutamic acid	1	N-Acetylglutamic acid	Glutamic acid	1
Serine	Glutamic acid	0
Lysine	Gly-Ile	0	Lysine	Gly-Ile	0
Lysine	Gly-Leu	0	Lysine	Gly-Leu	0
2-Hydroxy-4-methylpentanoic acid	Gly-Pro	0
Ornithine	Gly-Val	0	Ornithine	Gly-Val	0
N-omega-Acetylhistamine	Histamine	1	N-omega-Acetylhistamine	Histamine	1
N-Acetylhistamine	Histamine	1	N-Acetylhistamine	Histamine	1
N-Acetylhistidine	Histidine	1	N-Acetylhistidine	Histidine	1
N-Formylmethionine	Homocysteine	0	N-Formylmethionine	Homocysteine	0
N-Methylglutamic acid	Homoserine	0
Tropisetron	Huperzine	0	Tropisetron	Huperzine	0
Lactamide	Hydroxyproline	0
Methylglycinate	Hydroxyproline	0
Sarcosine	Hydroxyproline	0
Quercetin-3-O-beta-glucopyranosyl-6'-acetate	Hyperoside	1	Quercetin-3-O-beta-glucopyranosyl-6'-acetate	Hyperoside	1
Indole-3-propionic acid	Indole-3-carbinol	0	Indole-3-propionic acid	Indole-3-carbinol	0	structural isomer
Indole-3-pyruvic acid	Indole-3-carboxylic acid	0
N-Acetylleucine	Isoleucine	0	N-Acetylleucine	Isoleucine	0	structural isomer
N-Acetyl-leucine	Isoleucine	0	N-Acetyl-leucine	Isoleucine	0	structural isomer
Quercetin-3-O-beta-glucopyranosyl-6'-acetate	Isoquercetrin	0	Quercetin-3-O-beta-glucopyranosyl-6'-acetate	Isoquercetrin	0	Flavon → isoflavon
N-Acetylalanine	Lactamide	0
Nerylacetate	Linalool	0
N-epsilon-Acetyllysine	Lysine	1	N-epsilon-Acetyllysine	Lysine	1
Methyltestosterone	Medroxyprogesterone	0	Methyltestosterone	Medroxyprogesterone	0	structural isomer
N-Acetylmethionine	Methionine-methyl-13C-methyl-d3	1	N-Acetylmethionine	Methionine-methyl-13C-methyl-d3	1
N-Acetylmethionine	Methionine	1	N-Acetylmethionine	Methionine	1
N-Acetylalanine	Methylglycinate	0	N-Acetylalanine	Methylglycinate	0
Zolpidem	Mirtazapine	0	Zolpidem	Mirtazapine	0
Proline	N,N-Dimethylformamide	0
Sarcosine	N-Acetylalanine	0	Sarcosine	N-Acetylalanine	0
N-Acetylserine	N-Acetylglutamic acid	0
N-Methylaspartic acid	N-Acetylglutamic acid	0
O-Acetylserine	N-Acetylglutamic acid	0
O-Acetyl-L-serine	N-Acetylglutamic acid	0
N-Methylvaline	N-Acetylleucine	0	N-Methylvaline	N-Acetylleucine	0
Norleucine	N-Acetylleucine	0	Norleucine	N-Acetylleucine	0	structural isomer
Phenylalanine	N-Acetylphenylalanine	1	Phenylalanine	N-Acetylphenylalanine	1
Serine	N-Acetylserine	1	Serine	N-Acetylserine	1
Serotonin	N-Acetylserotonin	1					176.095	1.43938	218.106	1.51223
Tryptophan	N-Acetyltryptophan	1	Tryptophan	N-Acetyltryptophan	1
N-Methylalanine	N-Isobutyrylglycine	0	N-Methylalanine	N-Isobutyrylglycine	0
3-Aminoisobutyric acid	N-Isobutyrylglycine	0	3-Aminoisobutyric acid	N-Isobutyrylglycine	0
N,N-Dimethylglycine	N-Isobutyrylglycine	0	N,N-Dimethylglycine	N-Isobutyrylglycine	0
Norvaline	N-Isovalerylglycine	0	Norvaline	N-Isovalerylglycine	0
Valine	N-Isovalerylglycine	0	Valine	N-Isovalerylglycine	0
Butyrylglycine	N-Methylalanine	0	Butyrylglycine	N-Methylalanine	0
Phenylacetylglycine	N-Methylanthranilic acid	0
4-Aminophenol	N-Methylanthranilic acid	0	4-Aminophenol	N-Methylanthranilic acid	0
Serine	N-Methylaspartic acid	0	Serine	N-Methylaspartic acid	0
N-Methylserine	N-Methylglutamic acid	0
Threonine	N-Methylglutamic acid	0
Allothreonine	N-Methylglutamic acid	0
2',3'-Dideoxycytidine	N-Methylhistidine	0	2',3'-Dideoxycytidine	N-Methylhistidine	0
Phenylethanolamine	N-Methylphenylalanine	0
Tyramine	N-Methylphenylalanine	0
N-Acetyl-leucine	N-Methylvaline	0	N-Acetyl-leucine	N-Methylvaline	0
Urocanic acid	Nicotinoylglycine	0
N-Acetyl-leucine	Norleucine	0	N-Acetyl-leucine	Norleucine	0	structural isomer
Trimethylamine N-oxide	Norvaline	0	Trimethylamine N-oxide	Norvaline	0
Trimethylamine N-oxide	Norvaline	0	Trimethylamine N-oxide	Norvaline	0
Serine	O-Acetylserine	1	Serine	O-Acetylserine	1
Theanine	Ornithine	0	Theanine	Ornithine	0
Methamphetamine	Phendimetrazine	0	Methamphetamine	Phendimetrazine	0
Phentermine	Phendimetrazine	0	Phentermine	Phendimetrazine	0
Acetominophen	Phenylacetylglycine	0
Phenprobamate	Phenylethanolamine	0	Phenprobamate	Phenylethanolamine	0
Vinyl Carbamate	Pyroglutamic acid	0
O-Acetyl-L-serine	Serine	1	O-Acetyl-L-serine	Serine	1
1,5-Anhydrosorbitol	Threitol	0	1,5-Anhydrosorbitol	Threitol	0
Valine	Trimethylamine N-oxide	0
Phenprobamate	Tyramine	0	Phenprobamate	Tyramine	0
Trimethylamine N-oxide	Valine	0
alpha-Methylhistidine	2',3'-Dideoxycytidine	0	alpha-Methylhistidine	2',3'-Dideoxycytidine	0
Butyrylglycine	3-Aminoisobutyric acid	0	Butyrylglycine	3-Aminoisobutyric acid	0
Acetominophen	4-Aminophenol	1	Acetominophen	4-Aminophenol	1
N,N-Dimethylglycine	Butyrylglycine	0	N,N-Dimethylglycine	Butyrylglycine	0
Serotonin	N-Acetyl-5-hydroxytryptamine	1	Serotonin	N-Acetyl-5-hydroxytryptamine	1
	observations (positives)	206		observations (positives)	121
	TP	30		TP	28
	FP	176		FP	93
	FN	0		FN (positives outside data)	2
	TN	504304		TN	504387
	sensitivity/TPR	1		sensitivity/TPR	0.933333
	specificity/TNR	0.999651		specificity/TNR	0.999816
	FPR	0.000348874		FPR	0.000184348
	FDR	0.854369		FDR	0.768595
	accuracy	0.999651		accuracy	0.999812
	sensitivity	TPR=TP/P=TP/(TP+FN)=1-FNR
	specificity	TNR=TN/N=TN/(TN+FP)=1-FPR
	true negatives	TN=total comparisons – (TP+FP)
	false positive rate	FPR=FP/(FP+TN)
	false discovery rate	FDR=FP/(FP+TP)
	accuracy	ACC=(TP+TN)/(TP+TN+FP+FN)
	total comparisons	504510
	Choose(n, 2) + n
	n metabolites = 1004

## Sheet: acetylation_neg
metabolite1	metabolite2	+acetylation	metabolite1_rt	metabolite2_rt	+acetylation	note	Mass_1	ret_time_1	Mass_2	ret_time_1
4-Hydroxymandelonitrile	(2-oxo-2,3-dihydro-1H-indol-3-yl)acetic acid	0
4-Vinylphenol	1,2-Dihydro-1,2-naphthalenediol	0	4-Vinylphenol	1,2-Dihydro-1,2-naphthalenediol	0
Dihydro-4,4-dimethyl-2,3-furandione	1,4-Butynediol	0	Dihydro-4,4-dimethyl-2,3-furandione	1,4-Butynediol	0
3-Methyl-2-oxovaleric acid	1,4-Cyclohexanedicarboxylic acid	0	3-Methyl-2-oxovaleric acid	1,4-Cyclohexanedicarboxylic acid	0
4-Acetylbutyric acid	1,4-Cyclohexanedicarboxylic acid	0
4-Methyl-2-oxovaleric Acid	1,4-Cyclohexanedicarboxylic acid	0	4-Methyl-2-oxovaleric Acid	1,4-Cyclohexanedicarboxylic acid	0
Ketoleucine	1,4-Cyclohexanedicarboxylic acid	0	Ketoleucine	1,4-Cyclohexanedicarboxylic acid	0
Phlorobenzophenone	1-Hydroxy-2-naphthoic acid	0	Phlorobenzophenone	1-Hydroxy-2-naphthoic acid	0
7,8-Dihydrobiopterin	1-Methyladenosine	0
7,8-Dihydrobiopterin	2'-O-Methyladenosine	0	7,8-Dihydrobiopterin	2'-O-Methyladenosine	0
2-Furoic acid	2,3-Dihydroxybenzoic acid	0	2-Furoic acid	2,3-Dihydroxybenzoic acid	0
Resveratrol	2,3-Dihydroxybiphenyl	0
trans-Resveratrol	2,3-Dihydroxybiphenyl	0
4-Hydroxyphenylpyruvic acid	2,5-Dihydroxybenzaldehyde	0	4-Hydroxyphenylpyruvic acid	2,5-Dihydroxybenzaldehyde	0
Caffeic acid	2,5-Dihydroxybenzaldehyde	0
O-Acetylsalicylic acid	2,5-Dihydroxybenzaldehyde	0
Indole-3-pyruvic acid	2,8-Quinolinediol	0
N-Benzyloxycarbonylglycine	2-Amino-3-methoxybenzoic acid	0
Glycerol	2-Deoxyribose	0
2-Isopropylmalic acid	2-Deoxyribose	0
3,4-Dihydroxybenzoic acid	2-Furoic acid	0	3,4-Dihydroxybenzoic acid	2-Furoic acid	0
Gentisinic acid	2-Furoic acid	0
3-Methyladipic acid	2-Hydroxy-3-methylbutyric acid	0
Pimelic acid	2-Hydroxy-3-methylbutyric acid	0
2-Hydroxycinnamic acid	2-Hydroxybenzaldehyde	0
P-Coumaric acid	2-Hydroxybenzaldehyde	0
Phenylpyruvic acid	2-Hydroxybenzaldehyde	0
4-Hydroxycinnamic acid	2-Hydroxybenzaldehyde	0
M-Coumaric acid	2-Hydroxybenzaldehyde	0
3-Hydroxybenzaldehyde	2-Hydroxycinnamic acid	0
4-Hydroxybenzaldehyde	2-Hydroxycinnamic acid	0
Benzoic acid	2-Hydroxycinnamic acid	0
2-Methylglutaric acid	2-Hydroxyisobutyric acid	0	2-Methylglutaric acid	2-Hydroxyisobutyric acid	0
3-Methylglutaric acid	2-Hydroxyisobutyric acid	0	3-Methylglutaric acid	2-Hydroxyisobutyric acid	0
Adipic acid	2-Hydroxyisobutyric acid	0	Adipic acid	2-Hydroxyisobutyric acid	0
Catechol	2-Hydroxyphenylacetic acid	0
Ferulic acid	2-Hydroxyphenylacetic acid	0	Ferulic acid	2-Hydroxyphenylacetic acid	0
Pyrocatechol	2-Hydroxyphenylacetic acid	0
3-Hydroxybutyric acid	2-Methylglutaric acid	0
7,8-Dihydrobiopterin	2-O-Methyladenosine	0	7,8-Dihydrobiopterin	2-O-Methyladenosine	0
Alanine-2,3,3,3-d4	2-Propanamidoacetic acid	0	Alanine-2,3,3,3-d4	2-Propanamidoacetic acid	0
Alanine	2-Propanamidoacetic acid	0	Alanine	2-Propanamidoacetic acid	0
Sarcosine	2-Propanamidoacetic acid	0	Sarcosine	2-Propanamidoacetic acid	0
4-Hydroxy-6-methyl-2-pyrone	3,4-Dihydroxyphenylacetic acid	0
Benzene-1,2,4-triol	3,4-Dihydroxyphenylacetic acid	0
Phloroglucinol	3,4-Dihydroxyphenylacetic acid	0	Phloroglucinol	3,4-Dihydroxyphenylacetic acid	0
Pyrogallol	3,4-Dihydroxyphenylacetic acid	0
Dihydro-4,4-dimethyl-2,3-furandione	3,4-Dihydroxyphenylglycol	0
Creatinine	3-(1-Pyrazolyl)-alanine	0
N-Acetylhistidine	3-(1-Pyrazolyl)-alanine	0
3-(Hydroxymethyl)phenol	3-(3-Hydroxyphenyl)propionic acid	0	3-(Hydroxymethyl)phenol	3-(3-Hydroxyphenyl)propionic acid	0
3-Methylcatechol	3-(3-Hydroxyphenyl)propionic acid	0
4-Methylcatechol	3-(3-Hydroxyphenyl)propionic acid	0
Benzylsuccinic acid	3-(3-Hydroxyphenyl)propionic acid	0
Salicylic alcohol	3-(3-Hydroxyphenyl)propionic acid	0	Salicylic alcohol	3-(3-Hydroxyphenyl)propionic acid	0
Orcinol	3-(3-Hydroxyphenyl)propionic acid	0	Orcinol	3-(3-Hydroxyphenyl)propionic acid	0
3-Phenyllactic acid	3-(Hydroxymethyl)phenol	0	3-Phenyllactic acid	3-(Hydroxymethyl)phenol	0
3-(2-Hydroxyphenyl)propanoic acid	3-(Hydroxymethyl)phenol	0	3-(2-Hydroxyphenyl)propanoic acid	3-(Hydroxymethyl)phenol	0
Tropic acid	3-(Hydroxymethyl)phenol	0	Tropic acid	3-(Hydroxymethyl)phenol	0
Gly-Tyr	3-Aminotyrosine	0
4-Hydroxyhippuric acid	3-Hydroxyanthranilic acid	0
alpha-Hydroxyhippuric acid	3-Hydroxyanthranilic acid	0
Pyrrole-2-carboxylic acid	3-Hydroxyanthranilic acid	0	Pyrrole-2-carboxylic acid	3-Hydroxyanthranilic acid	0
P-Coumaric acid	3-Hydroxybenzaldehyde	0
Phenylpyruvic acid	3-Hydroxybenzaldehyde	0
4-Hydroxycinnamic acid	3-Hydroxybenzaldehyde	0
M-Coumaric acid	3-Hydroxybenzaldehyde	0
3-Methylglutaric acid	3-Hydroxybutyric acid	0
Adipic acid	3-Hydroxybutyric acid	0
Glyceric acid	3-Hydroxyglutaric acid	0	Glyceric acid	3-Hydroxyglutaric acid	0
Catechol	3-Hydroxyphenylacetic acid	0	Catechol	3-Hydroxyphenylacetic acid	0
Ferulic acid	3-Hydroxyphenylacetic acid	0
Pyrocatechol	3-Hydroxyphenylacetic acid	0
Ethylmalonic acid	3-Hydroxypropanoic acid	0	Ethylmalonic acid	3-Hydroxypropanoic acid	0
Glutaric acid	3-Hydroxypropanoic acid	0
Methylsuccinic acid	3-Hydroxypropanoic acid	0
3-Methyladipic acid	3-Hydroxyvaleric acid	0	3-Methyladipic acid	3-Hydroxyvaleric acid	0
Pimelic acid	3-Hydroxyvaleric acid	0	Pimelic acid	3-Hydroxyvaleric acid	0
4-Hydroxybenzylcyanide	3-Indoleacetic acid	0
Isobutyric acid	3-Methyl-2-oxovaleric acid	0
beta-Hydroxyisovaleric acid	3-Methyladipic acid	0
Diethyloxalpropionate	3-Methyladipic acid	0
Methyl-2-hydroxyisobutyric acid	3-Methyladipic acid	0
3-Phenyllactic acid	3-Methylcatechol	0
3-(2-Hydroxyphenyl)propanoic acid	3-Methylcatechol	0
Tropic acid	3-Methylcatechol	0
Proline	3-Methylcrotonylglycine	0	Proline	3-Methylcrotonylglycine	0
4-Methylcatechol	3-Phenyllactic acid	0
Benzylsuccinic acid	3-Phenyllactic acid	0	Benzylsuccinic acid	3-Phenyllactic acid	0
Salicylic alcohol	3-Phenyllactic acid	0	Salicylic alcohol	3-Phenyllactic acid	0
Orcinol	3-Phenyllactic acid	0	Orcinol	3-Phenyllactic acid	0
gamma-Aminobutyric acid	4-Acetamidobutyric acid	1	gamma-Aminobutyric acid	4-Acetamidobutyric acid	1
N,N-Dimethylglycine	4-Acetamidobutyric acid	0	N,N-Dimethylglycine	4-Acetamidobutyric acid	0
N-Methylalanine	4-Acetamidobutyric acid	1	N-Methylalanine	4-Acetamidobutyric acid	1
Isobutyric acid	4-Acetylbutyric acid	0	Isobutyric acid	4-Acetylbutyric acid	0	structural isomer
Acetominophen	4-Aminophenol	1	Acetominophen	4-Aminophenol	1
N-Methylanthranilic acid	4-Aminophenol	0	N-Methylanthranilic acid	4-Aminophenol	0
Acetaminophen	4-Aminophenol	1	Acetaminophen	4-Aminophenol	1
4-Hydroxymandelic acid	4-Hydroxy-6-methyl-2-pyrone	0
Homogentisic acid	4-Hydroxy-6-methyl-2-pyrone	0
Vanillic acid	4-Hydroxy-6-methyl-2-pyrone	0	Vanillic acid	4-Hydroxy-6-methyl-2-pyrone	0
P-Coumaric acid	4-Hydroxybenzaldehyde	0
Phenylpyruvic acid	4-Hydroxybenzaldehyde	0
4-Hydroxycinnamic acid	4-Hydroxybenzaldehyde	0
M-Coumaric acid	4-Hydroxybenzaldehyde	0
4-Hydroxyphenylpyruvic acid	4-Hydroxybenzoic acid	0	4-Hydroxyphenylpyruvic acid	4-Hydroxybenzoic acid	0
Caffeic acid	4-Hydroxybenzoic acid	0
O-Acetylsalicylic acid	4-Hydroxybenzoic acid	0	O-Acetylsalicylic acid	4-Hydroxybenzoic acid	0	structural isomer
Indole-3-acetic acid	4-Hydroxybenzylcyanide	0
5-Aminosalicylic acid	4-Hydroxyhippuric acid	0
Benzene-1,2,4-triol	4-Hydroxymandelic acid	0
Phloroglucinol	4-Hydroxymandelic acid	0	Phloroglucinol	4-Hydroxymandelic acid	0
Pyrogallol	4-Hydroxymandelic acid	0
5-Hydroxy-3-indoleacetic acid	4-Hydroxymandelonitrile	0
5-Hydroxyindole-3-acetic acid	4-Hydroxymandelonitrile	0
Catechol	4-Hydroxyphenylacetic acid	0
Ferulic acid	4-Hydroxyphenylacetic acid	0	Ferulic acid	4-Hydroxyphenylacetic acid	0
Pyrocatechol	4-Hydroxyphenylacetic acid	0
N-Benzyloxycarbonylglycine	4-Hydroxyphenylglycine	0	N-Benzyloxycarbonylglycine	4-Hydroxyphenylglycine	0
Sinapic acid	4-Hydroxyphenyllactic acid	0	Sinapic acid	4-Hydroxyphenyllactic acid	0
Salicylic acid	4-Hydroxyphenylpyruvic acid	0	Salicylic acid	4-Hydroxyphenylpyruvic acid	0
Isobutyric acid	4-Methyl-2-oxovaleric Acid	0
3-(2-Hydroxyphenyl)propanoic acid	4-Methylcatechol	0
Tropic acid	4-Methylcatechol	0
alpha-Hydroxyhippuric acid	5-Aminosalicylic acid	0
Pyrrole-2-carboxylic acid	5-Aminosalicylic acid	0
Actrarit	Acetominophen	0
Phenylacetylglycine	Acetominophen	0
Oxaloacetic acid	Aconitic acid	0	Oxaloacetic acid	Aconitic acid	0
Oxalacetic acid	Aconitic acid	0	Oxalacetic acid	Aconitic acid	0
N-Methylanthranilic acid	Actrarit	0
Acetaminophen	Actrarit	0
beta-N-Methylaminoalanine	Ala-Ala	0	beta-N-Methylaminoalanine	Ala-Ala	0
N-Methyllysine	Ala-Ile	0	N-Methyllysine	Ala-Ile	0
N-Methyllysine	Ala-Leu	0	N-Methyllysine	Ala-Leu	0
Lysine	Ala-Val	0	Lysine	Ala-Val	0
N-Acetylalanine	Alanine-2,3,3,3-d4	1	N-Acetylalanine	Alanine-2,3,3,3-d4	1
3-Hydroxyproline	Alanine-2,3,3,3-d4	0	3-Hydroxyproline	Alanine-2,3,3,3-d4	0
Hydroxyproline	Alanine-2,3,3,3-d4	0	Hydroxyproline	Alanine-2,3,3,3-d4	0
N-Acetylalanine	Alanine	1	N-Acetylalanine	Alanine	1
3-Hydroxyproline	Alanine	0	3-Hydroxyproline	Alanine	0
Hydroxyproline	Alanine	0	Hydroxyproline	Alanine	0
Pyridoxamine	Aprobarbital	0	Pyridoxamine	Aprobarbital	0
Quinic acid	Arabinose	0
Methyl-beta-galactopyranoside	Arabitol	0	Methyl-beta-galactopyranoside	Arabitol	0
Malic acid	Ascorbic acid	0	Malic acid	Ascorbic acid	0
N-Acetylaspartylglutamic acid	Asp-Glu	1	N-Acetylaspartylglutamic acid	Asp-Glu	1
Gly-Tyr	Asp-Phe	0
N-Acetylaspartic acid	Aspartic acid	1	N-Acetylaspartic acid	Aspartic acid	1
Homogentisic acid	Benzene-1,2,4-triol	0
Vanillic acid	Benzene-1,2,4-triol	0
P-Coumaric acid	Benzoic acid	0
Phenylpyruvic acid	Benzoic acid	0
4-Hydroxycinnamic acid	Benzoic acid	0
M-Coumaric acid	Benzoic acid	0
3-(2-Hydroxyphenyl)propanoic acid	Benzylsuccinic acid	0
Tropic acid	Benzylsuccinic acid	0
Pimelic acid	beta-Hydroxyisovaleric acid	0
gamma-Aminobutyric acid	Butyrylglycine	0	gamma-Aminobutyric acid	Butyrylglycine	0
N,N-Dimethylglycine	Butyrylglycine	0	N,N-Dimethylglycine	Butyrylglycine	0
N-Methylalanine	Butyrylglycine	0	N-Methylalanine	Butyrylglycine	0
Salicylic acid	Caffeic acid	0
Mandelic acid	Catechol	0
P-Anisic acid	Catechol	0
Vanillin	Catechol	0	Vanillin	Catechol	0
Pyruvic acid	Citraconic acid	0	Pyruvic acid	Citraconic acid	0
Glyceric acid	Citramalic acid	0
Tartaric acid	Citric acid	0	Tartaric acid	Citric acid	0
Histidine	Creatinine	0
N-Acetylcytidine	Cytarabine	0	N-Acetylcytidine	Cytarabine	0
N-Acetylcytidine	Cytidine	1	N-Acetylcytidine	Cytidine	1
Oxaloacetic acid	Dehydroascorbic acid	0	Oxaloacetic acid	Dehydroascorbic acid	0
Oxalacetic acid	Dehydroascorbic acid	0	Oxalacetic acid	Dehydroascorbic acid	0
Pimelic acid	Diethyloxalpropionate	0
N-Methyltyrosine	Dopamine	0
Glycolic acid	Erythronolactone	0	Glycolic acid	Erythronolactone	0
Galactose	Ethyl-beta-glucuronide	0	Galactose	Ethyl-beta-glucuronide	0
Glucose	Ethyl-beta-glucuronide	0	Glucose	Ethyl-beta-glucuronide	0
Inositol	Ethyl-beta-glucuronide	0	Inositol	Ethyl-beta-glucuronide	0
Mannose	Ethyl-beta-glucuronide	0	Mannose	Ethyl-beta-glucuronide	0
Psicose	Ethyl-beta-glucuronide	0
Sorbose	Ethyl-beta-glucuronide	0
Tagatose	Ethyl-beta-glucuronide	0	Tagatose	Ethyl-beta-glucuronide	0
Myoinositol	Ethyl-beta-glucuronide	0
Glyceraldehyde	Ethylmalonic acid	0	Glyceraldehyde	Ethylmalonic acid	0
Shikimic acid	Ethylmalonic acid	0
Mandelic acid	Ferulic acid	0	Mandelic acid	Ferulic acid	0
P-Anisic acid	Ferulic acid	0
Vanillin	Ferulic acid	0
N-Isobutyrylglycine	gamma-Aminobutyric acid	0	N-Isobutyrylglycine	gamma-Aminobutyric acid	0
Jasmonic acid	Geranic acid	0
N-Acetylglutamic acid	Glutamic acid-2,3,3,4,4-d5	1	N-Acetylglutamic acid	Glutamic acid-2,3,3,4,4-d5	1
Serine	Glutamic acid-2,3,3,4,4-d5	0
N-Acetylglutamic acid	Glutamic acid	1	N-Acetylglutamic acid	Glutamic acid	1
Serine	Glutamic acid	0
Glyceraldehyde	Glutaric acid	0	Glyceraldehyde	Glutaric acid	0
Shikimic acid	Glutaric acid	0
Lysine	Gly-Ile	0	Lysine	Gly-Ile	0
Ornithine	Gly-Val	0	Ornithine	Gly-Val	0
Methylsuccinic acid	Glyceraldehyde	0	Methylsuccinic acid	Glyceraldehyde	0
Methylmalonic acid	Glycolic acid	0	Methylmalonic acid	Glycolic acid	0
Succinic acid	Glycolic acid	0	Succinic acid	Glycolic acid	0
Lysine	Gly-Leu	0	Lysine	Gly-Leu	0
N-omega-Acetylhistamine	Histamine	1	N-omega-Acetylhistamine	Histamine	1
N-Acetylhistidine	Histidine	1	N-Acetylhistidine	Histidine	1
Phloroglucinol	Homogentisic acid	0	Phloroglucinol	Homogentisic acid	0
Pyrogallol	Homogentisic acid	0
N-Methylglutamic acid	Homoserine	0
Sinapic acid	Homovanillic acid	0	Sinapic acid	Homovanillic acid	0
Quercetin-3-O-beta-glucopyranosyl-6'-acetate	Hyperoside	1	Quercetin-3-O-beta-glucopyranosyl-6'-acetate	Hyperoside	1
Indole-3-pyruvic acid	Indole-3-carboxylic acid	0
Ketoleucine	Isobutyric acid	0
N-Acetylleucine	Isoleucine	0	N-Acetylleucine	Isoleucine	0	structural isomer
Quercetin-3-O-beta-glucopyranosyl-6'-acetate	Isoquercetrin	0	Quercetin-3-O-beta-glucopyranosyl-6'-acetate	Isoquercetrin	0	Flavon → isoflavon
Methylacetate	Ketoisovaleric acid	0	Methylacetate	Ketoisovaleric acid	0
Propionic acid	Ketoisovaleric acid	0
N-Acetylleucine	Leucine	1	N-Acetylleucine	Leucine	1
N-epsilon-Acetyllysine	Lysine	1	N-epsilon-Acetyllysine	Lysine	1
Pyrocatechol	Mandelic acid	0
N-Acetylmethionine	Methionine-methyl-13C-methyl-d3	1	N-Acetylmethionine	Methionine-methyl-13C-methyl-d3	1
N-Acetylmethionine	Methionine	1	N-Acetylmethionine	Methionine	1
Pimelic acid	Methyl-2-hydroxyisobutyric acid	0
Sinapic acid	Methyl-4-hydroxy-3-methoxybenzoate	0
Xylitol	Methyl-beta-galactopyranoside	0	Xylitol	Methyl-beta-galactopyranoside	0
Shikimic acid	Methylsuccinic acid	0
Proline	N,N-Dimethylformamide	0
N-Isobutyrylglycine	N,N-Dimethylglycine	0	N-Isobutyrylglycine	N,N-Dimethylglycine	0
Sarcosine	N-Acetylalanine	0	Sarcosine	N-Acetylalanine	0
N-Acetylserine	N-Acetylglutamic acid	0	N-Acetylserine	N-Acetylglutamic acid	0
O-Acetylserine	N-Acetylglutamic acid	0
N-Methylvaline	N-Acetylleucine	0	N-Methylvaline	N-Acetylleucine	0
Norleucine	N-Acetylleucine	0	Norleucine	N-Acetylleucine	0	structural isomer
Phenylalanine	N-Acetylphenylalanine	1	Phenylalanine	N-Acetylphenylalanine	1
Serine	N-Acetylserine	1	Serine	N-Acetylserine	1
Tryptophan	N-Acetyltryptophan	1	Tryptophan	N-Acetyltryptophan	1
N-Methylalanine	N-Isobutyrylglycine	0	N-Methylalanine	N-Isobutyrylglycine	0
Valine	N-Isovalerylglycine	0	Valine	N-Isovalerylglycine	0
Phenylacetylglycine	N-Methylanthranilic acid	0
N-Methylserine	N-Methylglutamic acid	0
Threonine	N-Methylglutamic acid	0
7,8-Dihydrobiopterin	N6-Methyladenosine	0	7,8-Dihydrobiopterin	N6-Methyladenosine	0
Urocanic acid	Nicotinoylglycine	0
Salicylic acid	O-Acetylsalicylic acid	1	Salicylic acid	O-Acetylsalicylic acid	1
Theanine	Ornithine	0	Theanine	Ornithine	0
Parabanic acid	Orotic acid	0
Pyrocatechol	P-Anisic acid	0
2,4-Dihydroxypyrimidine-5-carboxylic acid	Parabanic acid	0
Acetaminophen	Phenylacetylglycine	0
Vanillic acid	Phloroglucinol	0	Vanillic acid	Phloroglucinol	0
Ribose	Quinic acid	0
Xylose	Quinic acid	0
3-(2-Hydroxyphenyl)propanoic acid	Salicylic alcohol	0	3-(2-Hydroxyphenyl)propanoic acid	Salicylic alcohol	0
Tropic acid	Salicylic alcohol	0	Tropic acid	Salicylic alcohol	0
3-Hydroxyproline	Sarcosine	0	3-Hydroxyproline	Sarcosine	0
Hydroxyproline	Sarcosine	0	Hydroxyproline	Sarcosine	0
2-Carboxybenzaldehyde	Scopoletin	0
Carboxybenzaldehyde	Scopoletin	0	2-Carboxybenzaldehyde	Scopoletin	0
O-Acetylserine	Serine	1	O-Acetylserine	Serine	1
3-(4-Hydroxyphenyl)lactic acid	Sinapic acid	0	3-(4-Hydroxyphenyl)lactic acid	Sinapic acid	0
Methyl-4-hydroxy-3-methoxy-benzoate	Sinapic acid	0
Gluconic acid-gamma-lactone	Threonic acid	0	Gluconic acid-gamma-lactone	Threonic acid	0
Pyrogallol	Vanillic acid	0
Pyrocatechol	Vanillin	0
Orcinol	3-(2-Hydroxyphenyl)propanoic acid	0	Orcinol	3-(2-Hydroxyphenyl)propanoic acid	0
Tropic acid	Orcinol	0	Tropic acid	Orcinol	0
	observations (as identified as positive hydroxylation)	265		observations (positives)	132
	TP	23		TP	23
	FP	242		FP	109
	FN	0		FN (positives outside data)	0
	TN	347930		TN	348063
	sensitivity/TPR	1		sensitivity/TPR	1
	specificity/TNR	0.999305		specificity/TNR	0.999687
	FPR	0.000695059		FPR	0.000313064
	FDR	0.913208		FDR	0.825758
	accuracy	0.999305		accuracy	0.999687
	sensitivity	TPR=TP/P=TP/(TP+FN)=1-FNR
	specificity	TNR=TN/N=TN/(TN+FP)=1-FPR
	true negatives	TN=total comparisons – (TP+FP)
	false positive rate	FPR=FP/(FP+TN)
	false discovery rate	FDR=FP/(FP+TP)
	accuracy	ACC=(TP+TN)/(TP+TN+FP+FN)
	total comparisons	348195
	Choose(n, 2) + n
	n metabolites = 834

## Sheet: acetylation_H_neg
metabolite1	metabolite2	+acetylation	metabolite1_rt	metabolite2_rt	+acetylation
5-Aminoimidazole-4-carboxamide	1-Aminocyclopropane-1-carboxylic acid	0	5-Aminoimidazole-4-carboxamide	1-Aminocyclopropane-1-carboxylic acid	0
	observations (as identified as positive hydroxylation)	1		observations (positives)	1
	TP	0		TP	0
	FP	1		FP	1
	FN	0		FN (positives outside data)	0
	TN	348194		TN	348194
	sensitivity/TPR	#DIV/0!		sensitivity/TPR	#DIV/0!
	specificity/TNR	0.999997		specificity/TNR	0.999997
	FPR	2.87195e-06		FPR	2.87195e-06
	FDR	1		FDR	1
	accuracy	0.999997		accuracy	0.999997
	sensitivity	TPR=TP/P=TP/(TP+FN)=1-FNR
	specificity	TNR=TN/N=TN/(TN+FP)=1-FPR
	true negatives	TN=total comparisons – (TP+FP)
	false positive rate	FPR=FP/(FP+TN)
	false discovery rate	FDR=FP/(FP+TP)
	accuracy	ACC=(TP+TN)/(TP+TN+FP+FN)
	total comparisons	348195
	Choose(n, 2) + n
	n metabolites = 834

## Sheet: hydroxylation_pos
metabolite1	metabolite2	+hydroxylation	metabolite1_rt	metabolite2_rt	+hydroxylation	notes	Mass_1	ret_time_1	Mass_2	ret_time_1
N-Methylglutamic acid	4-Acetamidobutyric acid	0	N-Methylglutamic acid	4-Acetamidobutyric acid	0
N-Methylproline	4-Acetamidobutyric acid	0
Pipecolic acid	4-Acetamidobutyric acid	0
3',5'-Cyclic dAMP	Adenosine 3',5'-cyclic monophosphate	0	3',5'-Cyclic dAMP	Adenosine 3',5'-cyclic monophosphate	0
Guanosine-3',5'-cyclic monophosphate	Adenosine 3',5'-cyclic monophosphate	0	Guanosine-3',5'-cyclic monophosphate	Adenosine 3',5'-cyclic monophosphate	0
3',5'-Cyclic 2'-Deoxyadenosine monophosphate	Adenosine 3',5'-cyclic monophosphate	1	3',5'-Cyclic 2'-Deoxyadenosine monophosphate	Adenosine 3',5'-cyclic monophosphate	1
Guanosine 3',5'-cyclic monophosphate	Adenosine 3',5'-cyclic monophosphate	0	Guanosine 3',5'-cyclic monophosphate	Adenosine 3',5'-cyclic monophosphate	0	+oxo, shift of NH2
2'-Deoxyadenosine-5'-monophosphate	Adenosine 5'-monophosphate	1	2'-Deoxyadenosine-5'-monophosphate	Adenosine 5'-monophosphate	1
3-Indoleacetic acid	(2-oxo-2,3-dihydro-1H-indol-3-yl)acetic acid	0	3-Indoleacetic acid	(2-oxo-2,3-dihydro-1H-indol-3-yl)acetic acid	0	+ oxo
6-Hydroxycaproic acid	1,2-Cyclohexanediol	0
2-Hydroxy-4-methylpentanoic acid	1,2-Cyclohexanediol	0
Caffeine	1,3,7-Trimethyluric acid	0	Caffeine	1,3,7-Trimethyluric acid	0	+oxo
1,7-Dimethylxanthine	1,7-Dimethyluric acid	0	1,7-Dimethylxanthine	1,7-Dimethyluric acid	0	+oxo
Theophylline	1,7-Dimethyluric acid	0	Theophylline	1,7-Dimethyluric acid	0	+oxo
Indole-3-acetamide	1-Benzylimidazole	0
1-Methylguanosine	1-Methyladenosine	0
2'-O-Methylguanosine	1-Methyladenosine	0
3'-O-Methylguanosine	1-Methyladenosine	0
N2-Methylguanosine	1-Methyladenosine	0
2'-O-Methyladenosine	1-Methylguanosine	0	2'-O-Methyladenosine	1-Methylguanosine	0	Methoxy → hydroxy group, shift of NH2, + oxy + methyl group
6-Methyladenosine	1-Methylguanosine	0	6-Methyladenosine	1-Methylguanosine	0	+ oxy, shift of NH2, shift of methyl
N6-Methyladenosine	1-Methylguanosine	0	N6-Methyladenosine	1-Methylguanosine	0	+ oxy, shift of NH2, shift of methyl
5-Methoxyuridine	1-Methylpseudouridine	0				Methyl → methoxy
Thymidine	1-Methylpseudouridine	1	Thymidine	1-Methylpseudouridine	1
5-Methyl-3-deoxyuridine	1-Methylpseudouridine	0	5-Methyl-3-deoxyuridine	1-Methylpseudouridine	0	+ hydroxy group, oxy --> NH2
2'-Deoxyguanosine 3'-monophosphate	2'-Deoxyadenosine-5'-monophosphate	0	2'-Deoxyguanosine 3'-monophosphate	2'-Deoxyadenosine-5'-monophosphate	0	+ oxy, shift of NH2, shift of P
2'-Deoxyguanosine 5'-monophosphate	2'-Deoxyadenosine-5'-monophosphate	0	2'-Deoxyguanosine 5'-monophosphate	2'-Deoxyadenosine-5'-monophosphate	0	+ oxy, shift of NH2
Adenosine-3-monophosphate	2'-Deoxyadenosine-5'-monophosphate	0	Adenosine-3-monophosphate	2'-Deoxyadenosine-5'-monophosphate	0	+ hydroxy group, shift of P
2,3-Dideoxycytidine	2'-Deoxycytidine	1	2,3-Dideoxycytidine	2'-Deoxycytidine	1
Cytarabine	2'-Deoxycytidine	1	Cytarabine	2'-Deoxycytidine	1
Cytidine	2'-Deoxycytidine	1	Cytidine	2'-Deoxycytidine	1
2',3'-Dideoxycytidine	2'-Deoxycytidine	1	2',3'-Dideoxycytidine	2'-Deoxycytidine	1
Cordycepin	2'-Deoxyguanosine	0	Cordycepin	2'-Deoxyguanosine	0	shift of NH2, shift of hydroxy group, + oxy group
Guanosine	2'-Deoxyguanosine	1	Guanosine	2'-Deoxyguanosine	1
2'-Deoxyadenosine	2'-Deoxyguanosine	0	2'-Deoxyadenosine	2'-Deoxyguanosine	0	shift of NH2, + oxy
5'-O-Methylthymidine	2'-O-Methyl-5-methyluridine	0	5'-O-Methylthymidine	2'-O-Methyl-5-methyluridine	0	+ methyl, - methoxy group
2'-O-Methylguanosine	2'-O-Methyladenosine	0	2'-O-Methylguanosine	2'-O-Methyladenosine	0	+ oxy, shift of NH2
3'-O-Methylguanosine	2'-O-Methyladenosine	0	3'-O-Methylguanosine	2'-O-Methyladenosine	0	change of Methoxy and hydroxy group, shift of NH2, + oxy
N2-Methylguanosine	2'-O-Methyladenosine	0	N2-Methylguanosine	2'-O-Methyladenosine	0	Hydoxy → methoxy, -oxy, shift of NH2 + methyl group
5-Hydroxymethylcytidine	2'-O-Methylcytidine	0	5-Hydroxymethylcytidine	2'-O-Methylcytidine	0	+methyl+hydroxy group, methoxy → hydroxy group
6-Methyladenosine	2'-O-Methylguanosine	0	6-Methyladenosine	2'-O-Methylguanosine	0	Hydroxyl → methoxy, shift of NH2, methyl → oxy
N6-Methyladenosine	2'-O-Methylguanosine	0	N6-Methyladenosine	2'-O-Methylguanosine	0	Hydroxyl → methoxy, shift of NH2, methyl → oxy
5-Methoxyuridine	2'-O-Methyluridine	0	5-Methoxyuridine	2'-O-Methyluridine	0	Hydroxyl → methoxy, -methoxy group
Thymidine	2'-O-Methyluridine	0
5-Methyl-3-deoxyuridine	2'-O-Methyluridine	0
2-Deoxyuridine	2,3-Dideoxyuridine	1	2-Deoxyuridine	2,3-Dideoxyuridine	1
3-Aminotyrosine	2,3-Dideoxyuridine	0
3-Deoxyuridine	2,3-Dideoxyuridine	1	3-Deoxyuridine	2,3-Dideoxyuridine	1
2'-Deoxyuridine	2,3-Dideoxyuridine	1	2'-Deoxyuridine	2,3-Dideoxyuridine	1
Gly-Val	2,6-Diaminopimelic acid	0	Gly-Val	2,6-Diaminopimelic acid	0
Theanine	2,6-Diaminopimelic acid	0	Theanine	2,6-Diaminopimelic acid	0	+hydroxyl group, shift of oxy group
2-Hydroxyquinoline	2,8-Quinolinediol	1	2-Hydroxyquinoline	2,8-Quinolinediol	1
4-Hydroxyquinoline	2,8-Quinolinediol	0				+ hydroxyl group, shift of hydroxyl group
Indole-3-carboxaldehyde	2,8-Quinolinediol	0	Indole-3-carboxaldehyde	2,8-Quinolinediol	0
Quinolone	2,8-Quinolinediol	0	Quinolone	2,8-Quinolinediol	0	+ hydroxyl group, hydroxy --> oxy
3,5-Dihydroxyphenylglycine	2-Amino-3-methoxybenzoic acid	0	3,5-Dihydroxyphenylglycine	2-Amino-3-methoxybenzoic acid	0
4-Pyridoxic acid	2-Amino-3-methoxybenzoic acid	0	4-Pyridoxic acid	2-Amino-3-methoxybenzoic acid	0
Acetaminophen	2-Amino-3-methoxybenzoic acid	0
N-Methylanthranilic acid	2-Amino-3-methoxybenzoic acid	0	N-Methylanthranilic acid	2-Amino-3-methoxybenzoic acid	0	+ hydroxyl group, shift of methyl group
Acetominophen	2-Amino-3-methoxybenzoic acid	0	Acetominophen	2-Amino-3-methoxybenzoic acid	0
Acetaminophen	2-Aminoacetophenone	0	Acetaminophen	2-Aminoacetophenone	0
N-Methylanthranilic acid	2-Aminoacetophenone	0	N-Methylanthranilic acid	2-Aminoacetophenone	0	+ hydroxyl group, shift of methyl group
Acetominophen	2-Aminoacetophenone	0	Acetominophen	2-Aminoacetophenone	0
O-Phosphocolamine	2-Aminoethylphosphonic acid	0
Cladribine	2-Chloroadenosine	1	Cladribine	2-Chloroadenosine	1
Cytidine-5'-monophosphate	2-Deoxycytidine-5-monophosphoric acid	1	Cytidine-5'-monophosphate	2-Deoxycytidine-5-monophosphoric acid	1
Uridine	2-Deoxyuridine	1	Uridine	2-Deoxyuridine	1
3-Hydroxyphenylacetic acid	2-Hydroxyacetophenone	0
P-Anisic acid	2-Hydroxyacetophenone	0
Phenylacetaldehyde	2-Hydroxyacetophenone	0
Vanillin	2-Hydroxyacetophenone	0
p-Anisic acid	2-Hydroxyacetophenone	0	p-Anisic acid	2-Hydroxyacetophenone	0	+ methoxy group, shorter chain
Indole-3-carboxylic acid	2-Hydroxyquinoline	0
3,4-Dimethoxybenzaldehyde	2-Methoxy-4-vinylphenol	0
Acetaminophen	2-Phenylacetamide	1	Acetaminophen	2-Phenylacetamide	1
N-Methylanthranilic acid	2-Phenylacetamide	0
Acetominophen	2-Phenylacetamide	1	Acetominophen	2-Phenylacetamide	1
Glutamic acid	2-Propanamidoacetic acid	0	Glutamic acid	2-Propanamidoacetic acid	0
N-Acetylserine	2-Propanamidoacetic acid	0	N-Acetylserine	2-Propanamidoacetic acid	0
N-Methylaspartic acid	2-Propanamidoacetic acid	0
O-Acetylserine	2-Propanamidoacetic acid	0	O-Acetylserine	2-Propanamidoacetic acid	0
Proline	2-Propanamidoacetic acid	0
O-Acetyl-L-serine	2-Propanamidoacetic acid	0	O-Acetyl-L-serine	2-Propanamidoacetic acid	0
Pyridine	2-Pyridone	0				+ oxy
Pyrrole-2-carboxylic acid	2-Pyridone	1	Pyrrole-2-carboxylic acid	2-Pyridone	1
Pidotimod	2-Thiouridine	0
5-Hydroxymethylcytidine	3'-O-Methylcytidine	0	5-Hydroxymethylcytidine	3'-O-Methylcytidine	0	+ hydroxyl group, but shift of methyl goup
6-Methyladenosine	3'-O-Methylguanosine	0	6-Methyladenosine	3'-O-Methylguanosine	0
N6-Methyladenosine	3'-O-Methylguanosine	0	N6-Methyladenosine	3'-O-Methylguanosine	0	+ methoxy, - methyl group, shift of NH2
5-Methoxyuridine	3'-O-Methyluridine	0
Thymidine	3'-O-Methyluridine	0
5-Methyl-3-deoxyuridine	3'-O-Methyluridine	0	5-Methoxyuridine	3'-O-Methyluridine	0	+ hydroxyl group, shift of methyl group
3-Amino-3-(4-hydroxyphenyl)propionic acid	3,4-Dihydroxyphenylalanine	0	3-Amino-3-(4-hydroxyphenyl)propionic acid	3,4-Dihydroxyphenylalanine	0	+ hydroxyl group, shift of NH2 group
3-Hydroxyphenylalanine	3,4-Dihydroxyphenylalanine	1	3-Hydroxyphenylalanine	3,4-Dihydroxyphenylalanine	1
Tyrosine	3,4-Dihydroxyphenylalanine	1	Tyrosine	3,4-Dihydroxyphenylalanine	1
m-Tyrosine	3,4-Dihydroxyphenylalanine	1	m-Tyrosine	3,4-Dihydroxyphenylalanine	1
Cordycepin	Adenosine	1	Cordycepin	Adenosine	1
Guanosine	Adenosine	0	Guanosine	Adenosine	0	+ oxy, shift of NH2 group
2'-Deoxyadenosine	Adenosine	1	2'-Deoxyadenosine	Adenosine	1
Cortisol	Corticosterone	1	Cortisol	Corticosterone	1
Meprobamate	Ala-Ile	0
N,N-Dimethylformamide	Alanine-2,3,3,3-d4	0	N,N-Dimethylformamide	Alanine-2,3,3,3-d4	0
Serine	Alanine-2,3,3,3-d4	1	Serine	Alanine-2,3,3,3-d4	1
Meprobamate	Ala-Leu	0
4,5,7-Trihydroxyisoflavone	Daidzein	1					270.053	1.180767/1.26575	254.058	1.296733/1.3906
6-Hydroxyflavone	Daidzein	0	6-Hydroxyflavone	Daidzein	0	+ hydroxyl group, flavone --> isoflavone
Benzylacetate	3,4-Dimethoxybenzaldehyde	0
Hydrocinnamic acid	3,4-Dimethoxybenzaldehyde	0
Metronidazole	3-(1-Pyrazolyl)-alanine	0
Phenylalanine	3-Amino-3-(4-hydroxyphenyl)propionic acid	0	Phenylalanine	3-Amino-3-(4-hydroxyphenyl)propionic acid	0	+ hydroxyl group, shift of NH2
Uridine	3-Deoxyuridine	1	Uridine	3-Deoxyuridine	1
4-Aminobenzoic acid	3-Hydroxyanthranilic acid	0				+ hydroxyl group, shift of NH2
N-(2-Furoyl)glycine	3-Hydroxyanthranilic acid	0	N-(2-Furoyl)glycine	3-Hydroxyanthranilic acid	0
Kynurenine	3-Hydroxykynurenine	1	Kynurenine	3-Hydroxykynurenine	1
Phenylalanine	3-Hydroxyphenylalanine	1	Phenylalanine	3-Hydroxyphenylalanine	1
Glutamic acid	3-Hydroxyproline	0	Glutamic acid	3-Hydroxyproline	0
N-Acetylserine	3-Hydroxyproline	0
N-Methylaspartic acid	3-Hydroxyproline	0
O-Acetylserine	3-Hydroxyproline	0
Proline	3-Hydroxyproline	1	Proline	3-Hydroxyproline	1
O-Acetyl-L-serine	3-Hydroxyproline	0
5-Hydroxy-3-indoleacetic acid	3-Indoleacetic acid	1	5-Hydroxy-3-indoleacetic acid	3-Indoleacetic acid	1
5-Methoxy-3-indoleacetic acid	3-Indolepropionic acid	0	5-Methoxy-3-indoleacetic acid	3-Indolepropionic acid	0	+ methoxy group, shorter carboxylated chain
Indolelactic acid	3-Indolepropionic acid	1	Indolelactic acid	3-Indolepropionic acid	1
N-Cinnamoylglycine	3-Indolepropionic acid	0	N-Cinnamoylglycine	3-Indolepropionic acid	0
5-Hydroxymethylcytidine	3-Methylcytidine	0	5-Hydroxymethylcytidine	3-Methylcytidine	0	+ methoxy group, - methyl group
N-omega-Acetylhistamine	3-Methylhistidine	0	N-omega-Acetylhistamine	3-Methylhistidine	0
Secnidazole	3-Methylhistidine	0
N-Acetylhistamine	3-Methylhistidine	0	N-Acetylhistamine	3-Methylhistidine	0
Kaempferol	4,5,7-Trihydroxyisoflavone	0	Kaempferol	4,5,7-Trihydroxyisoflavone	0	flavone → isoflavone
5-Aminosalicylic acid	4-Aminobenzoic acid	0				+hydroxyl group, but shift of NH2 group
Benzamide	4-Aminobenzoic acid	0	Benzamide	4-Aminobenzoic acid	0	+hydroxyl group, but shift of NH2 group
N-Acetylleucine	4-Aminomethylcyclohexanecarboxylic acid	0
N-Acetyl-leucine	4-Aminomethylcyclohexanecarboxylic acid	0
6-Hydroxycaproic acid	4-Hydroxy-4-methyl-2-pentanone	0
2-Hydroxy-4-methylpentanoic acid	4-Hydroxy-4-methyl-2-pentanone	0
p-Coumaric acid	4-Hydroxyphenylpyruvic acid	0				+ oxo
Indole-3-carboxylic acid	4-Hydroxyquinoline	0
Scopoletin	4-Methylumbelliferone	0
Kynurenic acid	4-Quinolinecarboxylic acid	0	Kynurenic acid	4-Quinolinecarboxylic acid	0	+hydroxy, shift of carboxyl group
Acetylisatin	4-Quinolinecarboxylic acid	0
N-(2-Furoyl)glycine	5-Aminosalicylic acid	0	N-(2-Furoyl)glycine	5-Aminosalicylic acid	0
N-Methylthreonine	5-Aminovaleric acid	0	N-Methylthreonine	5-Aminovaleric acid	0
5-Methylcytidine	5-Hydroxymethylcytidine	1	5-Methylcytidine	5-Hydroxymethylcytidine	1
Tryptophan	5-Hydroxytryptophan	1	Tryptophan	5-Hydroxytryptophan	1
Indole-3-propionic acid	5-Methoxy-3-indoleacetic acid	0	Indole-3-propionic acid	5-Methoxy-3-indoleacetic acid	0	shorter carboxyled chain (-CH2), + methoxy group
N-Acetylphenylalanine	5-Methoxytryptophol	0	N-Acetylphenylalanine	5-Methoxytryptophol	0
5-Methyluridine	5-Methoxyuridine	0	5-Methyluridine	5-Methoxyuridine	0	exchange from methoxy to methyl
3-Methyluridine	5-Methoxyuridine	0	3-Methyluridine	5-Methoxyuridine	0	+hydroxy group, shift of methyl group
Thymidine	5-Methyluridine	0	Thymidine	5-Methyluridine	0	+hydroxy group, shift of methyl and oxy group
5-Methyl-3-deoxyuridine	5-Methyluridine	1	5-Methyl-3-deoxyuridine	5-Methyluridine	1
Ethylbutanoate	6-Hydroxycaproic acid	0
Hexanoic acid	6-Hydroxycaproic acid	1					116.084	4.88773	133.086	1.33983
N2-Methylguanosine	6-Methyladenosine	0	N2-Methylguanosine	6-Methyladenosine	0	+oxo group, but NH+methyl group at different position
Cordycepin	8-Oxo-2-deoxyadenosine	0	Cordycepin	8-Oxo-2-deoxyadenosine	0	+oxo group, hydroxy group at different position
Guanosine	8-Oxo-2-deoxyadenosine	0	Guanosine	8-Oxo-2-deoxyadenosine	0	+hydroxy group, oxy group and NH2 group at different position
2'-Deoxyadenosine	8-Oxo-2-deoxyadenosine	0	2'-Deoxyadenosine	8-Oxo-2-deoxyadenosine	0	+oxo
Acetanilide	Acetaminophen	1	Acetanilide	Acetaminophen	1
N-Methylanthranilic acid	Acetanilide	0	N-Methylanthranilic acid	Acetanilide	0
Acetominophen	Acetanilide	1	Acetominophen	Acetanilide	1
N-Benzyloxycarbonylglycine	Actrarit	0	N-Benzyloxycarbonylglycine	Actrarit	0
Guanine	Adenine	0	Guanine	Adenine	0	+oxo +shift of NH2 group
N,N-Dimethylformamide	Alanine	0	N,N-Dimethylformamide	Alanine	0
Serine	Alanine	1	Serine	Alanine	1
Nifekalant	Alfuzosin	0
Phenylpropanolamine	Amphetamine	1	Phenylpropanolamine	Amphetamine	1
N-gamma-Acetyl-N-2-formyl-5-methoxykynurenamine	Asp-Phe	0	N-gamma-Acetyl-N-2-formyl-5-methoxykynurenamine	Asp-Phe	0
Phenylacetylglutamine	Asp-Phe	0	Phenylacetylglutamine	Asp-Phe	0
Benzphetamine	Atomexetine	0	Benzphetamine	Atomexetine	0
Cetraxate	Atropine	0	Cetraxate	Atropine	0
Ifenprodil	Benproperine	0	Ifenprodil	Benproperine	0
Diphenhydramine	Benzphetamine	0	Diphenhydramine	Benzphetamine	0
N,N-Dimethylformamide	beta-Alanine	0	N,N-Dimethylformamide	beta-Alanine	0
Serine	beta-Alanine	0	Serine	beta-Alanine	0
N-Methylthreonine	Betaine	0	N-Methylthreonine	Betaine	0
p-Coumaric acid	Caffeic acid	1	p-Coumaric acid	Caffeic acid	1
Trileptal	Carbamazepine	0				+oxo
N-Acetylcysteine	Carbocysteine	0	N-Acetylcysteine	Carbocysteine	0
N-Methylisoleucine	Carnitine	0	N-Methylisoleucine	Carnitine	0
N-Methylleucine	Carnitine	0	N-Methylleucine	Carnitine	0
Hyoscyamine	Cetraxate	0	Hyoscyamine	Cetraxate	0
Diazepam	Clobazam	0				+oxo, benzene at N instead of C
Dimethyl phthalate	Coniferylaldehyde	0
Ferulic acid	Coniferylaldehyde	1	Ferulic acid	Coniferylaldehyde	1
Cortodoxone	Cortisol	1	Cortodoxone	Cortisol	1
Tryptamine	Cotinine	0
Selegiline	Crotamiton	0
Deoxycytidine 5'-monophosphate	Cytidine-5'-monophosphate	1	Deoxycytidine 5'-monophosphate	Cytidine-5'-monophosphate	1
Lysine	delta-Hydroxylysine	1	Lysine	delta-Hydroxylysine	1
Temazepam	Diazepam	1	Temazepam	Diazepam	1
Phenylethanolamine	Dopamine	0	Phenylethanolamine	Dopamine	0	+hydroxylation, shift of hydroxyl group
Pyridoxine	Dopamine	0
Tyramine	Dopamine	1	Tyramine	Dopamine	1
Catechin	Epigallocatechin	0	Catechin	Epigallocatechin	0	stereoisomer
Epicatechin	Epigallocatechin	1	Epicatechin	Epigallocatechin	1
2-Hydroxy-4-methylpentanoic acid	Ethylbutanoate	0
RU 24969	Etomidate	0
Glycitein	Formononetine	0	Glycitein	Formononetine	0	demethylation+methoxylation
Scopolamine	Galanthamine	0
Cocaine	Galanthamine	0
Homoserine	gamma-Aminobutyric acid	0	Homoserine	gamma-Aminobutyric acid	0
N-Methylserine	gamma-Aminobutyric acid	0	N-Methylserine	gamma-Aminobutyric acid	0
Threonine	gamma-Aminobutyric acid	0	Threonine	gamma-Aminobutyric acid	0
Allothreonine	gamma-Aminobutyric acid	0	Allothreonine	gamma-Aminobutyric acid	0
Hydroxyproline	Glutamic acid	0	Hydroxyproline	Glutamic acid	0
N-Acetylalanine	Glutamic acid	0	N-Acetylalanine	Glutamic acid	0
2-Hydroxy-4-methylpentanoic acid	Hexanoic acid	0				hydroxylation of shorter chain + methylation
Metronidazole	Histidine	0
N-Methylalanine	Homoserine	0	N-Methylalanine	Homoserine	0
3-Aminoisobutyric acid	Homoserine	0	3-Aminoisobutyric acid	Homoserine	0
N,N-Dimethylglycine	Homoserine	0	N,N-Dimethylglycine	Homoserine	0
Oxymorphone	Hydromorphone	1	Oxymorphone	Hydromorphone	1
N-Acetylserine	Hydroxyproline	0
N-Methylaspartic acid	Hydroxyproline	0
O-Acetylserine	Hydroxyproline	0
Proline	Hydroxyproline	1	Proline	Hydroxyproline	1
O-Acetyl-L-serine	Hydroxyproline	0
Quercetin-3-ramnoside	Hyperoside	0	Quercetin-3-ramnoside	Hyperoside	0	shift of hydroxyl group
Purine	Hypoxanthine	0	Purine	Hypoxanthine	0	+oxo
Methadone	Ifenprodil	0	Methadone	Ifenprodil	0
Indole-3-carboxylic acid	Indole-3-carboxaldehyde	1	Indole-3-carboxylic acid	Indole-3-carboxaldehyde	1
Quinolone	Indole-3-carboxylic acid	0
Indole-3-propionic acid	Indolelactic acid	1	Indole-3-propionic acid	Indolelactic acid	1
Xanthosine	Inosine	0	Xanthosine	Inosine	0	+oxo
Quercetin-3-ramnoside	Isoquercetrin	0	Quercetin-3-ramnoside	Isoquercetrin	0	flavone → isoflavone
Rutin	Kaempferol-3-O-rutinoside	1	Rutin	Kaempferol-3-O-rutinoside	1
Stavudine	Kynurenine	0
N,N-Dimethylformamide	Lactamide	0	N,N-Dimethylformamide	Lactamide	0
Serine	Lactamide	0	Serine	Lactamide	0
Mecillinam	Levosulpiride	0	Mecillinam	Levosulpiride	0
Methioninesulfoxide	Methionine-methyl-13C-methyl-d3	0	Methioninesulfoxide	Methionine-methyl-13C-methyl-d3	0	+oxo
Methioninesulfoxide	Methionine	0	Methioninesulfoxide	Methionine	0	+oxo
2-Deoxyribose	Methyl-3-hydroxybutyric acid	0
N,N-Dimethylformamide	Methylglycinate	0	N,N-Dimethylformamide	Methylglycinate	0
Serine	Methylglycinate	0	Serine	Methylglycinate	0
Ecgonine methylester	Methyprylon	0	Ecgonine methylester	Methyprylon	0
Sarcosine	N,N-Dimethylformamide	0	Sarcosine	N,N-Dimethylformamide	0
N6-Isopentenyladenosine	N-2-Hydroxycyclopentyladenosine	0	N6-Isopentenyladenosine	N-2-Hydroxycyclopentyladenosine	0
N-Acetylserine	N-Acetylalanine	0	N-Acetylserine	N-Acetylalanine	0
N-Methylaspartic acid	N-Acetylalanine	0
O-Acetylserine	N-Acetylalanine	0	O-Acetylserine	N-Acetylalanine	0
Proline	N-Acetylalanine	0
O-Acetyl-L-serine	N-Acetylalanine	0	O-Acetyl-L-serine	N-Acetylalanine	0
S-Carboxymethylcysteine	N-Acetylcysteine	0	S-Carboxymethylcysteine	N-Acetylcysteine	0	addition of OH, but longer CH2 chain
Phenylacetylglycine	N-Benzyloxycarbonylglycine	0	Phenylacetylglycine	N-Benzyloxycarbonylglycine	0
Indole-3-propionic acid	N-Cinnamoylglycine	0	Indole-3-propionic acid	N-Cinnamoylglycine	0
N-Methylglutamic acid	N-Isobutyrylglycine	0	N-Methylglutamic acid	N-Isobutyrylglycine	0
N-Methylproline	N-Isobutyrylglycine	0
Pipecolic acid	N-Isobutyrylglycine	0
N-Methylserine	N-Methylalanine	0	N-Methylserine	N-Methylalanine	0
Threonine	N-Methylalanine	0	Threonine	N-Methylalanine	0
Allothreonine	N-Methylalanine	0	Allothreonine	N-Methylalanine	0
Butyrylglycine	N-Methylglutamic acid	0	Butyrylglycine	N-Methylglutamic acid	0
N-omega-Acetylhistamine	N-Methylhistidine	0	N-omega-Acetylhistamine	N-Methylhistidine	0
Secnidazole	N-Methylhistidine	0
N-Acetylhistamine	N-Methylhistidine	0	N-Acetylhistamine	N-Methylhistidine	0
N-Methyltyrosine	N-Methylphenylalanine	1	N-Methyltyrosine	N-Methylphenylalanine	1
Methyltyrosinate	N-Methylphenylalanine	0
Butyrylglycine	N-Methylproline	0
3-Aminoisobutyric acid	N-Methylserine	0	3-Aminoisobutyric acid	N-Methylserine	0
N,N-Dimethylglycine	N-Methylserine	0	N,N-Dimethylglycine	N-Methylserine	0
Norvaline	N-Methylthreonine	0	Norvaline	N-Methylthreonine	0
Valine	N-Methylthreonine	0	Valine	N-Methylthreonine	0
Phenprobamate	N-Methyltyrosine	0	Phenprobamate	N-Methyltyrosine	0
alpha-Methylhistidine	N-omega-Acetylhistamine	0	alpha-Methylhistidine	N-omega-Acetylhistamine	0
N6-Methyladenosine	N2-Methylguanosine	0	N6-Methyladenosine	N2-Methylguanosine	0	+oxo, methylgroup at different position
Urocanic acid	Nicotinamide	0	Urocanic acid	Nicotinamide	0
Hydrocodone	Oxycodone	1	Hydrocodone	Oxycodone	1
Piperine	Oxymorphone	0	Piperine	Oxymorphone	0
3,4-Methylenedioxyethamphetamine	Phendimetrazine	0	3,4-Methylenedioxyethamphetamine	Phendimetrazine	0
Phenylethanolamine	Phenethylamine	1	Phenylethanolamine	Phenethylamine	1
Tyramine	Phenethylamine	1	Tyramine	Phenethylamine	1
Styrene	Phenylacetaldehyde	0
Tyrosine	Phenylalanine	1	Tyrosine	Phenylalanine	1
m-Tyrosine	Phenylalanine	1	m-Tyrosine	Phenylalanine	1
Synephrine	Phenylpropanolamine	0	Synephrine	Phenylpropanolamine	0
Catechin	Phloretin	0	Catechin	Phloretin	0
Epicatechin	Phloretin	0	Epicatechin	Phloretin	0
Dihydrosphingosine	Phytosphingosine	1	Dihydrosphingosine	Phytosphingosine	1
Tocainide	Pilocarpine	0
Butyrylglycine	Pipecolic acid	0
Tropisetron	Remacemide	0
Kaempferol 3-O-rutinoside	Rutin	1	Kaempferol 3-O-rutinoside	Rutin	1
Serine	Sarcosine	0	Serine	Sarcosine	0
alpha-Methylhistidine	Secnidazole	0
3-Aminoisobutyric acid	Threonine	0	3-Aminoisobutyric acid	Threonine	0
N,N-Dimethylglycine	Threonine	0	N,N-Dimethylglycine	Threonine	0
3-Methyluridine	Thymidine	0				+hydroxylation, change of methyl group
Porphobilinogen	Thymidine	0
Serotonin	Tryptamine	1					176.095	1.43938	160.1	4.7123
Nitrendipine	Tyr-Tyr	0
Deoxyuridine monophosphate	Uridine 5'-monophosphate	1	Deoxyuridine monophosphate	Uridine 5'-monophosphate	1
2'-Deoxyuridine	Uridine	1	2'-Deoxyuridine	Uridine	1
Quercetin-3-ramnoside	Vitexin	0				C-glycosylation → O-glycosylation
Glucose	1,5-Anhydrosorbitol	1	Glucose	1,5-Anhydrosorbitol	1
2-Hydroxy-3-methylbutyric acid	2-Deoxyribose	0	2-Hydroxy-3-methylbutyric acid	2-Deoxyribose	0
3-Hydroxyvaleric acid	2-Deoxyribose	0	3-Hydroxyvaleric acid	2-Deoxyribose	0
beta-Hydroxyisovaleric acid	2-Deoxyribose	0
Allothreonine	3-Aminoisobutyric acid	0	Allothreonine	3-Aminoisobutyric acid	0	+ hydroxyl group, structural isomer
5-Methyl-3-deoxyuridine	3-Methyluridine	0
Porphobilinogen	5-Methyl-3-deoxyuridine	0
N,N-Dimethylglycine	Allothreonine	0	N,N-Dimethylglycine	Allothreonine	0
N-Acetylhistamine	alpha-Methylhistidine	0	N-Acetylhistamine	alpha-Methylhistidine	0
Phenprobamate	Methyltyrosinate	0	Phenprobamate	Methyltyrosinate	0
	observations (as identified as positive hydroxylation)	304		observations (positives)	212
	TP	65		TP	62
	FP	239		FP	150
	FN	0		FN (positives outside data)	3
	TN	504206		TN	504295
	sensitivity/TPR	1		sensitivity/TPR	0.953846
	specificity/TNR	0.999526		specificity/TNR	0.999703
	FPR	0.000473788		FPR	0.000297357
	FDR	0.786184		FDR	0.707547
	accuracy	0.999526		accuracy	0.999697
	sensitivity	TPR=TP/P=TP/(TP+FN)=1-FNR
	specificity	TNR=TN/N=TN/(TN+FP)=1-FPR
	true negatives	TN=total comparisons – (TP+FP)
	false positive rate	FPR=FP/(FP+TN)
	false discovery rate	FDR=FP/(FP+TP)
	accuracy	ACC=(TP+TN)/(TP+TN+FP+FN)
	total comparisons	504510
	Choose(n, 2) + n
	n metabolites = 1004

## Sheet: hydroxylation_neg
metabolite1	metabolite2	+hydroxylation	metabolite1_rt	metabolite2_rt	+hydroxylation	notes	Mass_1	ret_time_1	Mass_2	ret_time_1
Pidotimod	4-Thiouridine	0
3-Indoleacetic acid	(2-oxo-2,3-dihydro-1H-indol-3-yl)acetic acid	0	3-Indoleacetic acid	(2-oxo-2,3-dihydro-1H-indol-3-yl)acetic acid	0
Indole-3-acetic acid	(2-oxo-2,3-dihydro-1H-indol-3-yl)acetic acid	0	Indole-3-acetic acid	(2-oxo-2,3-dihydro-1H-indol-3-yl)acetic acid	0	+oxo
Coniferylaldehyde	1,2-Dihydro-1,2-naphthalenediol	0
Dihydro-4,4-dimethyl-2,3-furandione	1,3 Cyclohexanedione	0	Dihydro-4,4-dimethyl-2,3-furandione	1,3 Cyclohexanedione	0
Galactose	1,5-Anhydrosorbitol	0	Galactose	1,5-Anhydrosorbitol	0	stereoisomer
Glucose	1,5-Anhydrosorbitol	1	Glucose	1,5-Anhydrosorbitol	1
Inositol	1,5-Anhydrosorbitol	0	Inositol	1,5-Anhydrosorbitol	0
Mannose	1,5-Anhydrosorbitol	0	Mannose	1,5-Anhydrosorbitol	0	stereoisomer
Psicose	1,5-Anhydrosorbitol	0
Sorbose	1,5-Anhydrosorbitol	0	Sorbose	1,5-Anhydrosorbitol	0
Tagatose	1,5-Anhydrosorbitol	0	Tagatose	1,5-Anhydrosorbitol	0
Myoinositol	1,5-Anhydrosorbitol	0	Myoinositol	1,5-Anhydrosorbitol	0
1,7-Dimethylxanthine	1,7-Dimethyluric acid	0	1,7-Dimethylxanthine	1,7-Dimethyluric acid	0
Theophylline	1,7-Dimethyluric acid	0	Theophylline	1,7-Dimethyluric acid	0
N-Acetylglycine	1-Aminocyclopropane-1-carboxylic acid	0
1-Methylguanosine	1-Methyladenosine	0
2'-O-Methylguanosine	1-Methyladenosine	0
3'-O-Methylguanosine	1-Methyladenosine	0
N2-Methylguanosine	1-Methyladenosine	0
2'-O-Methyladenosine	1-Methylguanosine	0	2'-O-Methyladenosine	1-Methylguanosine	0	methoxy → hydroxy group, shift of NH2, + oxy + methyl group
2-O-Methyladenosine	1-Methylguanosine	0	2-O-Methyladenosine	1-Methylguanosine	0	+oxy, shift of metyl group, shift of NH2
N6-Methyladenosine	1-Methylguanosine	0	N6-Methyladenosine	1-Methylguanosine	0	+ oxy, shift of NH2, shift of methyl
5-Hydroxymethyluridine	1-Methylpseudouridine	0	5-Hydroxymethyluridine	1-Methylpseudouridine	0
5-Methoxyuridine	1-Methylpseudouridine	0
Thymidine	1-Methylpseudouridine	1	Thymidine	1-Methylpseudouridine	1
5-Methyl-3-deoxyuridine	1-Methylpseudouridine	0	5-Methyl-3-deoxyuridine	1-Methylpseudouridine	0	+ hydroxy group, oxy --> NH2
2'-Deoxyguanosine 5'-monophosphate	2'-Deoxyadenosine 5'-monophosphate	0	2'-Deoxyguanosine 5'-monophosphate	2'-Deoxyadenosine 5'-monophosphate	0	+ oxy, shift of NH2
Adenosine 5'-monophosphate	2'-Deoxyadenosine 5'-monophosphate	1	Adenosine 5'-monophosphate	2'-Deoxyadenosine 5'-monophosphate	1
Adenosine-3-monophosphate	2'-Deoxyadenosine 5'-monophosphate	0	Adenosine-3-monophosphate	2'-Deoxyadenosine 5'-monophosphate	0	+ hydroxy group, shift of P
2'-Adenylic acid	2'-Deoxyadenosine 5'-monophosphate	0
2'-Deoxyguanosine 3'-monophosphate	2'-Deoxyadenosine 5'-monophosphate	0	2'-Deoxyguanosine 3'-monophosphate	2'-Deoxyadenosine 5'-monophosphate	0	+ oxy, shift of NH2, shift of P
Adenosine-3'-monophosphate	2'-Deoxyadenosine 5'-monophosphate	0				+hydroxy, shift of PEARSON()
Deoxyguanosine 5'-monophosphate	2'-Deoxyadenosine 5'-monophosphate	0	Deoxyguanosine 5'-monophosphate	2'-Deoxyadenosine 5'-monophosphate	0	+oxy, shift of NH2
Cytarabine	2'-Deoxycytidine	1	Cytarabine	2'-Deoxycytidine	1
Cytidine	2'-Deoxycytidine	1	Cytidine	2'-Deoxycytidine	1
Guanosine-5'-monophosphate	2'-Deoxyguanosine 5'-monophosphate	1	Guanosine-5'-monophosphate	2'-Deoxyguanosine 5'-monophosphate	1
5'-O-Methylthymidine	2'-O-Methyl-5-methyluridine	0	5'-O-Methylthymidine	2'-O-Methyl-5-methyluridine	0	+ methyl, - methoxy group
2'-O-Methylguanosine	2'-O-Methyladenosine	0	2'-O-Methylguanosine	2'-O-Methyladenosine	0	+ oxy, shift of NH2
3'-O-Methylguanosine	2'-O-Methyladenosine	0	3'-O-Methylguanosine	2'-O-Methyladenosine	0	change of Methoxy and hydroxy group, shift of NH2, + oxy
N2-Methylguanosine	2'-O-Methyladenosine	0	N2-Methylguanosine	2'-O-Methyladenosine	0	Hydoxy → methoxy, -oxy, shift of NH2 + methyl group
5-Hydroxymethylcytidine	2'-O-Methylcytidine	0	5-Hydroxymethylcytidine	2'-O-Methylcytidine	0	+methyl+hydroxy group, methoxy → hydroxy group
2-O-Methyladenosine	2'-O-Methylguanosine	0	2-O-Methyladenosine	2'-O-Methylguanosine	0	+oxy, shift of NH2, shift of methyl group
N6-Methyladenosine	2'-O-Methylguanosine	0	N6-Methyladenosine	2'-O-Methylguanosine	0	Hydroxyl → methoxy, shift of NH2, methyl → oxy
5-Hydroxymethyluridine	2'-O-Methyluridine	0	5-Hydroxymethyluridine	2'-O-Methyluridine	0
5-Methoxyuridine	2'-O-Methyluridine	0	5-Methoxyuridine	2'-O-Methyluridine	0	Hydroxyl → methoxy, -methoxy group
Thymidine	2'-O-Methyluridine	0
5-Methyl-3-deoxyuridine	2'-O-Methyluridine	0
2-Deoxyuridine	2,3-Dideoxyuridine	1	2-Deoxyuridine	2,3-Dideoxyuridine	1
3-Aminotyrosine	2,3-Dideoxyuridine	0
3-Deoxyuridine	2,3-Dideoxyuridine	1	3-Deoxyuridine	2,3-Dideoxyuridine	1
2'-Deoxyuridine	2,3-Dideoxyuridine	1	2'-Deoxyuridine	2,3-Dideoxyuridine	1
2,5-Dihydroxybenzaldehyde	2,3-Dihydroxybenzoic acid	0	2,5-Dihydroxybenzaldehyde	2,3-Dihydroxybenzoic acid	0	stereoisomer
4-Hydroxybenzoic acid	2,3-Dihydroxybenzoic acid	0	4-Hydroxybenzoic acid	2,3-Dihydroxybenzoic acid	0	stereoisomer
Gallic acid	2,3-Dihydroxybenzoic acid	0	Gallic acid	2,3-Dihydroxybenzoic acid	0	stereoisomer
Salicylic acid	2,3-Dihydroxybenzoic acid	1	Salicylic acid	2,3-Dihydroxybenzoic acid	1
2-Hydroxybenzaldehyde	2,5-Dihydroxybenzaldehyde	1	2-Hydroxybenzaldehyde	2,5-Dihydroxybenzaldehyde	1
3,4-Dihydroxybenzoic acid	2,5-Dihydroxybenzaldehyde	0	3,4-Dihydroxybenzoic acid	2,5-Dihydroxybenzaldehyde	0	stereoisomer
3-Hydroxybenzaldehyde	2,5-Dihydroxybenzaldehyde	0
4-Hydroxybenzaldehyde	2,5-Dihydroxybenzaldehyde	0
Benzoic acid	2,5-Dihydroxybenzaldehyde	0
Gentisinic acid	2,5-Dihydroxybenzaldehyde	1	Gentisinic acid	2,5-Dihydroxybenzaldehyde	1
Gly-Val	2,6-Diaminopimelic acid	0	Gly-Val	2,6-Diaminopimelic acid	0
Theanine	2,6-Diaminopimelic acid	0	Theanine	2,6-Diaminopimelic acid	0	+hydroxyl group, shift of oxy group
2-Hydroxyquinoline	2,8-Quinolinediol	1	2-Hydroxyquinoline	2,8-Quinolinediol	1
Indole-3-carboxaldehyde	2,8-Quinolinediol	0	Indole-3-carboxaldehyde	2,8-Quinolinediol	0
4-Hydroxyquinoline	2,8-Quinolinediol	0				+ hydroxyl group, shift of hydroxyl group
Quinolone	2,8-Quinolinediol	0				+ hydroxyl group, hydroxy --> oxy
3,5-Dihydroxyphenylglycine	2-Amino-3-methoxybenzoic acid	0	3,5-Dihydroxyphenylglycine	2-Amino-3-methoxybenzoic acid	0
4-Pyridoxic acid	2-Amino-3-methoxybenzoic acid	0	4-Pyridoxic acid	2-Amino-3-methoxybenzoic acid	0
Acetominophen	2-Amino-3-methoxybenzoic acid	0
N-Methylanthranilic acid	2-Amino-3-methoxybenzoic acid	0	N-Methylanthranilic acid	2-Amino-3-methoxybenzoic acid	0	+ hydroxyl group, shift of methyl group
Acetaminophen	2-Amino-3-methoxybenzoic acid	0	Acetaminophen	2-Amino-3-methoxybenzoic acid	0
O-Phosphocolamine	2-Aminoethylphosphonic acid	0
Cladribine	2-Chloroadenosine	1	Cladribine	2-Chloroadenosine	1
Cytidine-5'-monophosphate	2-Deoxycytidine-5-monophosphoric acid	1	Cytidine-5'-monophosphate	2-Deoxycytidine-5-monophosphoric acid	1
2-Hydroxy-3-methylbutyric acid	2-Deoxyribose	0	2-Hydroxy-3-methylbutyric acid	2-Deoxyribose	0
3-Hydroxyvaleric acid	2-Deoxyribose	0	3-Hydroxyvaleric acid	2-Deoxyribose	0
Arabinose	2-Deoxyribose	0	Arabinose	2-Deoxyribose	0	stereoisomer
beta-Hydroxyisovaleric acid	2-Deoxyribose	0	beta-Hydroxyisovaleric acid	2-Deoxyribose	0
Methyl-2-hydroxyisobutyric acid	2-Deoxyribose	0	Methyl-2-hydroxyisobutyric acid	2-Deoxyribose	0
Ribose	2-Deoxyribose	1	Ribose	2-Deoxyribose	1
Xylose	2-Deoxyribose	0	Xylose	2-Deoxyribose	0	stereoisomer
Pseudouridine	2-Deoxyuridine	0	Pseudouridine	2-Deoxyuridine	0
Uridine	2-Deoxyuridine	1	Uridine	2-Deoxyuridine	1
4-Hydroxy-4-methyl-2-pentanone	2-Hydroxy-4-methylpentanoic acid	0
Ethylbutanoate	2-Hydroxy-4-methylpentanoic acid	0
tert-Butyric acid	2-Hydroxy-4-methylpentanoic acid	0
4-Hydroxybenzoic acid	2-Hydroxybenzaldehyde	0	4-Hydroxybenzoic acid	2-Hydroxybenzaldehyde	0	stereoisomer
Salicylic acid	2-Hydroxybenzaldehyde	1	Salicylic acid	2-Hydroxybenzaldehyde	1
3-Isochromanone	2-Hydroxycinnamic acid	0
4-Hydroxyphenylpyruvic acid	2-Hydroxycinnamic acid	0				stereoisomer
Caffeic acid	2-Hydroxycinnamic acid	0	Caffeic acid	2-Hydroxycinnamic acid	0	stereoisomer
Cinnamic acid	2-Hydroxycinnamic acid	1	Cinnamic acid	2-Hydroxycinnamic acid	1
Dihydrocoumarin	2-Hydroxycinnamic acid	0	Dihydrocoumarin	2-Hydroxycinnamic acid	0
O-Acetylsalicylic acid	2-Hydroxycinnamic acid	0
Isobutyric acid	2-Hydroxyisobutyric acid	1	Isobutyric acid	2-Hydroxyisobutyric acid	1
4-Nitrocatechol	2-Hydroxynicotinic acid	0
Nicotinic acid	2-Hydroxynicotinic acid	1	Nicotinic acid	2-Hydroxynicotinic acid	1
3,4-Dihydroxyphenylacetic acid	2-Hydroxyphenylacetic acid	0	3,4-Dihydroxyphenylacetic acid	2-Hydroxyphenylacetic acid	0	stereoisomer
4-Hydroxymandelic acid	2-Hydroxyphenylacetic acid	0	4-Hydroxymandelic acid	2-Hydroxyphenylacetic acid	0
Homogentisic acid	2-Hydroxyphenylacetic acid	1	Homogentisic acid	2-Hydroxyphenylacetic acid	1
Vanillic acid	2-Hydroxyphenylacetic acid	0
Indole-3-carboxylic acid	2-Hydroxyquinoline	0	Indole-3-carboxylic acid	2-Hydroxyquinoline	0
Mucic acid	2-Ketogluconic acid	0	Mucic acid	2-Ketogluconic acid	0
Gluconic acid-gamma-lactone	2-Ketogluconic acid	0	Gluconic acid-gamma-lactone	2-Ketogluconic acid	0
3-(3-Hydroxyphenyl)propionic acid	2-Methoxy-4-vinylphenol	0
3-Phenyllactic acid	2-Methoxy-4-vinylphenol	0
3-(2-Hydroxyphenyl)propanoic acid	2-Methoxy-4-vinylphenol	0
Tropic acid	2-Methoxy-4-vinylphenol	0
3-Hydroxy-3-methylglutaric acid	2-Methylglutaric acid	0	3-Hydroxy-3-methylglutaric acid	2-Methylglutaric acid	0
3-Methyl-2-oxovaleric acid	2-Methylglutaric acid	0
4-Acetylbutyric acid	2-Methylglutaric acid	0	4-Acetylbutyric acid	2-Methylglutaric acid	0
4-Methyl-2-oxovaleric Acid	2-Methylglutaric acid	0
Ketoleucine	2-Methylglutaric acid	0
3'-O-Methylguanosine	2-O-Methyladenosine	0	3'-O-Methylguanosine	2-O-Methyladenosine	0	+oxy, shift of NH2
N2-Methylguanosine	2-O-Methyladenosine	0	N2-Methylguanosine	2-O-Methyladenosine	0	+oxy, shift of NH2, shift of methyl
Glutamic acid-2,3,3,4,4-d5	2-Propanamidoacetic acid	0	Glutamic acid-2,3,3,4,4-d5	2-Propanamidoacetic acid	0
Glutamic acid	2-Propanamidoacetic acid	0	Glutamic acid	2-Propanamidoacetic acid	0
N-Acetylserine	2-Propanamidoacetic acid	0	N-Acetylserine	2-Propanamidoacetic acid	0
Proline	2-Propanamidoacetic acid	0
O-Acetylserine	2-Propanamidoacetic acid	0	O-Acetylserine	2-Propanamidoacetic acid	0
Pidotimod	2-Thiouridine	0
Adenosine 3',5'-cyclic monophosphate	3',5'-Cyclic dAMP	0	Adenosine 3',5'-cyclic monophosphate	3',5'-Cyclic dAMP	0
5-Hydroxymethylcytidine	3'-O-Methylcytidine	0	5-Hydroxymethylcytidine	3'-O-Methylcytidine	0	+ hydroxyl group, shift of methyl goup
N6-Methyladenosine	3'-O-Methylguanosine	0	N6-Methyladenosine	3'-O-Methylguanosine	0	+ methoxy, - methyl group, shift of NH2
5-Hydroxymethyluridine	3'-O-Methyluridine	0	5-Hydroxymethyluridine	3'-O-Methyluridine	0
5-Methoxyuridine	3'-O-Methyluridine	0	5-Methoxyuridine	3'-O-Methyluridine	0
Thymidine	3'-O-Methyluridine	0
5-Methyl-3-deoxyuridine	3'-O-Methyluridine	0				+ hydroxyl group, shift of methyl group
4-Hydroxybenzoic acid	3,4-Dihydroxybenzoic acid	1	4-Hydroxybenzoic acid	3,4-Dihydroxybenzoic acid	1
Gallic acid	3,4-Dihydroxybenzoic acid	1	Gallic acid	3,4-Dihydroxybenzoic acid	1
Salicylic acid	3,4-Dihydroxybenzoic acid	0	Salicylic acid	3,4-Dihydroxybenzoic acid	0	stereoisomer
3,4-Dihydroxyphenylacetic acid	3,4-Dihydroxymandelic acid	1	3,4-Dihydroxyphenylacetic acid	3,4-Dihydroxymandelic acid	1
4-Hydroxymandelic acid	3,4-Dihydroxymandelic acid	1	4-Hydroxymandelic acid	3,4-Dihydroxymandelic acid	1
Homogentisic acid	3,4-Dihydroxymandelic acid	0	Homogentisic acid	3,4-Dihydroxymandelic acid	0	stereoisomer
Vanillic acid	3,4-Dihydroxymandelic acid	0	Vanillic acid	3,4-Dihydroxymandelic acid	0
3-Hydroxyphenylacetic acid	3,4-Dihydroxyphenylacetic acid	1	3-Hydroxyphenylacetic acid	3,4-Dihydroxyphenylacetic acid	1
4-Hydroxyphenylacetic acid	3,4-Dihydroxyphenylacetic acid	1	4-Hydroxyphenylacetic acid	3,4-Dihydroxyphenylacetic acid	1
Mandelic acid	3,4-Dihydroxyphenylacetic acid	0
Methylgallate	3,4-Dihydroxyphenylacetic acid	0
P-Anisic acid	3,4-Dihydroxyphenylacetic acid	0	P-Anisic acid	3,4-Dihydroxyphenylacetic acid	0
Vanillin	3,4-Dihydroxyphenylacetic acid	0	Vanillin	3,4-Dihydroxyphenylacetic acid	0
3-Amino-3-(4-hydroxyphenyl)propionic acid	3,4-Dihydroxyphenylalanine	0	3-Amino-3-(4-hydroxyphenyl)propionic acid	3,4-Dihydroxyphenylalanine	0	+ hydroxyl group, shift of NH2 group
3-Hydroxyphenylalanine	3,4-Dihydroxyphenylalanine	1	3-Hydroxyphenylalanine	3,4-Dihydroxyphenylalanine	1
Tyrosine	3,4-Dihydroxyphenylalanine	1	Tyrosine	3,4-Dihydroxyphenylalanine	1
M-Tyrosine	3,4-Dihydroxyphenylalanine	1	M-Tyrosine	3,4-Dihydroxyphenylalanine	1
4-Hydroxyphenylglycine	3,5-Dihydroxyphenylglycine	0	4-Hydroxyphenylglycine	3,5-Dihydroxyphenylglycine	0	stereoisomer
4-Hydroxyphenyllactic acid	3-(3-Hydroxyphenyl)propionic acid	0	4-Hydroxyphenyllactic acid	3-(3-Hydroxyphenyl)propionic acid	0	stereoisomer
Benzylacetate	3-(3-Hydroxyphenyl)propionic acid	0
Homovanillic acid	3-(3-Hydroxyphenyl)propionic acid	0	Homovanillic acid	3-(3-Hydroxyphenyl)propionic acid	0
Hydrocinnamic acid	3-(3-Hydroxyphenyl)propionic acid						150.068	1.107583/8.733767	166.063	1.334233/1.43095	ambiguous, since another entry shows two different retention time values
Methyl-4-hydroxy-3-methoxybenzoate	3-(3-Hydroxyphenyl)propionic acid	0
3-(4-Hydroxyphenyl)lactic acid	3-(3-Hydroxyphenyl)propionic acid	0	3-(4-Hydroxyphenyl)lactic acid	3-(3-Hydroxyphenyl)propionic acid	0	stereoisomer
Methyl-4-hydroxy-3-methoxy-benzoate	3-(3-Hydroxyphenyl)propionic acid	0
Phenylalanine	3-Amino-3-(4-hydroxyphenyl)propionic acid	0	Phenylalanine	3-Amino-3-(4-hydroxyphenyl)propionic acid	0	+ hydroxyl group, shift of NH2
Pseudouridine	3-Deoxyuridine	0	Pseudouridine	3-Deoxyuridine	0
Uridine	3-Deoxyuridine	0	Uridine	3-Deoxyuridine	0
3-Methylglutaric acid	3-Hydroxy-3-methylglutaric acid	1	3-Methylglutaric acid	3-Hydroxy-3-methylglutaric acid	1
Adipic acid	3-Hydroxy-3-methylglutaric acid	0	Adipic acid	3-Hydroxy-3-methylglutaric acid	0
Gluconic acid-gamma-lactone	3-Hydroxy-3-methylglutaric acid	0
N-(2-Furoyl)glycine	3-Hydroxyanthranilic acid	0	N-(2-Furoyl)glycine	3-Hydroxyanthranilic acid	0
Aspartic acid	3-Hydroxyaspartic acid	1	Aspartic acid	3-Hydroxyaspartic acid	1
4-Hydroxybenzoic acid	3-Hydroxybenzaldehyde	0	4-Hydroxybenzoic acid	3-Hydroxybenzaldehyde	0	stereoisomer
Salicylic acid	3-Hydroxybenzaldehyde	0	Salicylic acid	3-Hydroxybenzaldehyde	0	stereoisomer
Isobutyric acid	3-Hydroxybutyric acid	0	Isobutyric acid	3-Hydroxybutyric acid	0
Ethylmalonic acid	3-Hydroxyglutaric acid	0	Ethylmalonic acid	3-Hydroxyglutaric acid	0
Glutaric acid	3-Hydroxyglutaric acid	1	Glutaric acid	3-Hydroxyglutaric acid	1
Methylsuccinic acid	3-Hydroxyglutaric acid	0	Methylsuccinic acid	3-Hydroxyglutaric acid	0
Kynurenine	3-Hydroxykynurenine	1	Kynurenine	3-Hydroxykynurenine	1
4-Hydroxymandelic acid	3-Hydroxyphenylacetic acid	0	4-Hydroxymandelic acid	3-Hydroxyphenylacetic acid	0	stereoisomer
Homogentisic acid	3-Hydroxyphenylacetic acid	0	Homogentisic acid	3-Hydroxyphenylacetic acid	0	stereoisomer
Vanillic acid	3-Hydroxyphenylacetic acid	0	Vanillic acid	3-Hydroxyphenylacetic acid	0
Phenylalanine	3-Hydroxyphenylalanine	1	Phenylalanine	3-Hydroxyphenylalanine	1
Glyceric acid	3-Hydroxypropanoic acid	0	Glyceric acid	3-Hydroxypropanoic acid	0
Methylacetate	3-Hydroxypropanoic acid	0
Propionic acid	3-Hydroxypropanoic acid	1	Propionic acid	3-Hydroxypropanoic acid	1
5-Hydroxy-3-indoleacetic acid	3-Indoleacetic acid	1	5-Hydroxy-3-indoleacetic acid	3-Indoleacetic acid	1
5-Hydroxyindole-3-acetic acid	3-Indoleacetic acid	1	5-Hydroxyindole-3-acetic acid	3-Indoleacetic acid	1
5-Methoxy-3-indoleacetic acid	3-Indolepropionic acid	0	5-Methoxy-3-indoleacetic acid	3-Indolepropionic acid	0	+ methoxy group, shorter carboxylated chain
Indolelactic acid	3-Indolepropionic acid	1	Indolelactic acid	3-Indolepropionic acid	1
N-Cinnamoylglycine	3-Indolepropionic acid	0	N-Cinnamoylglycine	3-Indolepropionic acid	0
P-Coumaric acid	3-Isochromanone	0
Phenylpyruvic acid	3-Isochromanone	0
4-Hydroxycinnamic acid	3-Isochromanone	0
M-Coumaric acid	3-Isochromanone	0
3-Methylglutaric acid	3-Methyl-2-oxovaleric acid	0
Adipic acid	3-Methyl-2-oxovaleric acid	0
2-Isopropylmalic acid	3-Methyladipic acid	0	2-Isopropylmalic acid	3-Methyladipic acid	0
4-Acetylbutyric acid	3-Methylglutaric acid	0	4-Acetylbutyric acid	3-Methylglutaric acid	0
4-Methyl-2-oxovaleric Acid	3-Methylglutaric acid	0
Ketoleucine	3-Methylglutaric acid	0
N-omega-Acetylhistamine	3-Methylhistidine	0	N-omega-Acetylhistamine	3-Methylhistidine	0
5-Hydroxymethyluridine	3-Methyluridine	0	5-Hydroxymethyluridine	3-Methyluridine	0	shift of methyl group
5-Methoxyuridine	3-Methyluridine	0	5-Methoxyuridine	3-Methyluridine	0	+hydroxy group, shift of methyl group
Thymidine	3-Methyluridine	0				+hydroxy group, shift of methyl and oxy group
5-Methyl-3-deoxyuridine	3-Methyluridine	0
4-Hydroxyphenyllactic acid	3-Phenyllactic acid	1	4-Hydroxyphenyllactic acid	3-Phenyllactic acid	1
Benzylacetate	3-Phenyllactic acid	0
Homovanillic acid	3-Phenyllactic acid	0
Hydrocinnamic acid	3-Phenyllactic acid						150.068	1.107583/8.733767	166.063	1.941017/2.0448	ambiguous, since another entry shows two different retention time values
Methyl-4-hydroxy-3-methoxybenzoate	3-Phenyllactic acid	0
3-(4-Hydroxyphenyl)lactic acid	3-Phenyllactic acid	1	3-(4-Hydroxyphenyl)lactic acid	3-Phenyllactic acid	1
Methyl-4-hydroxy-3-methoxy-benzoate	3-Phenyllactic acid	0
Dihydroxyacetone phosphate	3-Phosphonopropionic acid	0	Dihydroxyacetone phosphate	3-Phosphonopropionic acid	0
Phosphomycin	3-Phosphonopropionic acid	0	Phosphomycin	3-Phosphonopropionic acid	0
Daidzein	4,5,7-Trihydroxyisoflavone	1					254.058	1.302367/1.39275	270.053	1.181567/1.2723
Kaempferol	4,5,7-Trihydroxyisoflavone	0	Kaempferol	4,5,7-Trihydroxyisoflavone	0	flavone → isoflavone
N-Methylglutamic acid	4-Acetamidobutyric acid	0	N-Methylglutamic acid	4-Acetamidobutyric acid	0
Adipic acid	4-Acetylbutyric acid	0	Adipic acid	4-Acetylbutyric acid	0
4-Hydroxyphenyllactic acid	4-Hydroxy-3-methoxymandelic acid	0	4-Hydroxyphenyllactic acid	4-Hydroxy-3-methoxymandelic acid	0
Homovanillic acid	4-Hydroxy-3-methoxymandelic acid	1	Homovanillic acid	4-Hydroxy-3-methoxymandelic acid	1
Methyl-4-hydroxy-3-methoxybenzoate	4-Hydroxy-3-methoxymandelic acid	0	Methyl-4-hydroxy-3-methoxybenzoate	4-Hydroxy-3-methoxymandelic acid	0
3-(4-Hydroxyphenyl)lactic acid	4-Hydroxy-3-methoxymandelic acid	0	3-(4-Hydroxyphenyl)lactic acid	4-Hydroxy-3-methoxymandelic acid	0
Methyl-4-hydroxy-3-methoxy-benzoate	4-Hydroxy-3-methoxymandelic acid	0	Methyl-4-hydroxy-3-methoxy-benzoate	4-Hydroxy-3-methoxymandelic acid	0
6-Hydroxycaproic acid	4-Hydroxy-4-methyl-2-pentanone	0
Catechol	4-Hydroxy-6-methyl-2-pyrone	0	Catechol	4-Hydroxy-6-methyl-2-pyrone	0
Pyrocatechol	4-Hydroxy-6-methyl-2-pyrone	0	Pyrocatechol	4-Hydroxy-6-methyl-2-pyrone	0
4-Hydroxybenzoic acid	4-Hydroxybenzaldehyde	1	4-Hydroxybenzoic acid	4-Hydroxybenzaldehyde	1
Salicylic acid	4-Hydroxybenzaldehyde	0	Salicylic acid	4-Hydroxybenzaldehyde	0	structural isomer
Benzoic acid	4-Hydroxybenzoic acid	1	Benzoic acid	4-Hydroxybenzoic acid	1
Gentisinic acid	4-Hydroxybenzoic acid	0	Gentisinic acid	4-Hydroxybenzoic acid	0	structural isomer
4-Hydroxymandelonitrile	4-Hydroxybenzylcyanide	1	4-Hydroxymandelonitrile	4-Hydroxybenzylcyanide	1
4-Hydroxyphenylacetic acid	4-Hydroxymandelic acid	1	4-Hydroxyphenylacetic acid	4-Hydroxymandelic acid	1
Mandelic acid	4-Hydroxymandelic acid	1	Mandelic acid	4-Hydroxymandelic acid	1
Methylgallate	4-Hydroxymandelic acid	0
P-Anisic acid	4-Hydroxymandelic acid	0	P-Anisic acid	4-Hydroxymandelic acid	0
Vanillin	4-Hydroxymandelic acid	0	Vanillin	4-Hydroxymandelic acid	0
Homogentisic acid	4-Hydroxyphenylacetic acid	0	Homogentisic acid	4-Hydroxyphenylacetic acid	0	structural isomer
Vanillic acid	4-Hydroxyphenylacetic acid	0
4-Pyridoxic acid	4-Hydroxyphenylglycine	0
Acetominophen	4-Hydroxyphenylglycine	1	Acetominophen	4-Hydroxyphenylglycine	1
N-Methylanthranilic acid	4-Hydroxyphenylglycine	0	N-Methylanthranilic acid	4-Hydroxyphenylglycine	0
Acetaminophen	4-Hydroxyphenylglycine	1	Acetaminophen	4-Hydroxyphenylglycine	1
Syringic acid	4-Hydroxyphenyllactic acid	0
3-(2-Hydroxyphenyl)propanoic acid	4-Hydroxyphenyllactic acid	0	3-(2-Hydroxyphenyl)propanoic acid	4-Hydroxyphenyllactic acid	0	structural isomer
Tropic acid	4-Hydroxyphenyllactic acid	0	Tropic acid	4-Hydroxyphenyllactic acid	0
P-Coumaric acid	4-Hydroxyphenylpyruvic acid	0				+oxo
Phenylpyruvic acid	4-Hydroxyphenylpyruvic acid	1					164.047	1.39385/1.47635	180.042	1.022933/1.123533	in positive mode: retention time of 4-hydroxyphenylpyruvic acid 1.222883/1.894167
4-Hydroxycinnamic acid	4-Hydroxyphenylpyruvic acid	0				+oxo
M-Coumaric acid	4-Hydroxyphenylpyruvic acid	0
Adipic acid	4-Methyl-2-oxovaleric Acid	0
Scopoletin	4-Methylumbelliferone	0
4-Nitrophenol	4-Nitrocatechol	1	4-Nitrophenol	4-Nitrocatechol	1
6-Hydroxynicotinic acid	4-Nitrocatechol	0
Nicotinic acid	4-Nitrophenol	0
Acetylisatin	4-Quinolinecarboxylic acid	0
Kynurenic acid	4-Quinolinecarboxylic acid	0	Kynurenic acid	4-Quinolinecarboxylic acid	0	+hydroxy, shift of carboxyl group
N-(2-Furoyl)glycine	5-Aminosalicylic acid	0	N-(2-Furoyl)glycine	5-Aminosalicylic acid	0
Indole-3-acetic acid	5-Hydroxy-3-indoleacetic acid	1	Indole-3-acetic acid	5-Hydroxy-3-indoleacetic acid	1
5-Methylcytidine	5-Hydroxymethylcytidine	1	5-Methylcytidine	5-Hydroxymethylcytidine	1
5-Methyluridine	5-Hydroxymethyluridine	1	5-Methyluridine	5-Hydroxymethyluridine	1
Tryptophan	5-Hydroxytryptophan	1	Tryptophan	5-Hydroxytryptophan	1
Indole-3-propionic acid	5-Methoxy-3-indoleacetic acid	0	Indole-3-propionic acid	5-Methoxy-3-indoleacetic acid	0	shorter carboxyled chain (-CH2), + methoxy group
5-Methyluridine	5-Methoxyuridine	0	5-Methyluridine	5-Methoxyuridine	0	exchange from methoxy to methyl
Thymidine	5-Methyluridine	1	Thymidine	5-Methyluridine	1
5-Methyl-3-deoxyuridine	5-Methyluridine	1	5-Methyl-3-deoxyuridine	5-Methyluridine	1
Ethylbutanoate	6-Hydroxycaproic acid	0
tert-Butyric acid	6-Hydroxycaproic acid	0
Daidzein	6-Hydroxyflavone	0	Daidzein	6-Hydroxyflavone	0	+ hydroxyl group, flavone --> isoflavone
Nicotinic acid	6-Hydroxynicotinic acid	1					123.032	3.979917/3.981017/4.257184	139.027	1.43387
Cordycepin	8-Oxo-2-deoxyadenosine	0	Cordycepin	8-Oxo-2-deoxyadenosine	0	+oxo group, hydroxy group at different position
Deoxyadenosine	8-Oxo-2-deoxyadenosine	0
Guanosine	8-Oxo-2-deoxyadenosine	0	Guanosine	8-Oxo-2-deoxyadenosine	0	+hydroxy group, shift of oxy group and NH2
2'-Deoxyadenosine	8-Oxo-2-deoxyadenosine	0				+oxo
Moniliformin	Acetylenedicarboxylic acid	0	Moniliformin	Acetylenedicarboxylic acid	0
N-Benzyloxycarbonylglycine	Actrarit	0	N-Benzyloxycarbonylglycine	Actrarit	0
Guanine	Adenine	0	Guanine	Adenine	0	+oxo, shift of NH2 group
Guanosine-3',5'-cyclic monophosphate	Adenosine 3',5'-cyclic monophosphate	0	Guanosine-3',5'-cyclic monophosphate	Adenosine 3',5'-cyclic monophosphate	0
Guanosine-5'-monophosphate	Adenosine 5'-monophosphate	0	Guanosine-5'-monophosphate	Adenosine 5'-monophosphate	0	+oxo, shift of NH2 group
Guanosine-5'-monophosphate	Adenosine-3-monophosphate	0	Guanosine-5'-monophosphate	Adenosine-3-monophosphate	0	+oxo, shift of NH2 group, shift P
Cordycepin	Adenosine	1	Cordycepin	Adenosine	1
Deoxyadenosine	Adenosine	1					251.102	7.66963	267.097	4.72265/4.8911
Guanosine	Adenosine	0	Guanosine	Adenosine	0	+ oxy, shift of NH2 group
2'-Deoxyadenosine	Adenosine	1					251.102	7.32813	267.097	4.72265/4.8911	retention time in positive mode of 2’-deoxyadenosine: 3.921917
Ketoleucine	Adipic acid	0
N,N-Dimethylformamide	Alanine-2,3,3,3-d4	0	N,N-Dimethylformamide	Alanine-2,3,3,3-d4	0
Serine	Alanine-2,3,3,3-d4	1	Serine	Alanine-2,3,3,3-d4	1
N,N-Dimethylformamide	Alanine	0	N,N-Dimethylformamide	Alanine	0
Serine	Alanine	1	Serine	Alanine
Nifekalant	Alfuzosin	0
Porphobilinogen	Aprobarbital	0	Porphobilinogen	Aprobarbital	0
Phenyl-beta-glucopyranoside	Arbutin	1	Phenyl-beta-glucopyranoside	Arbutin	1
Citric acid	Ascorbic acid	0	Citric acid	Ascorbic acid	0
N-gamma-Acetyl-N-2-formyl-5-methoxykynurenamine	Asp-Phe	0	N-gamma-Acetyl-N-2-formyl-5-methoxykynurenamine	Asp-Phe	0
Phenylacetylglutamine	Asp-Phe	0	Phenylacetylglutamine	Asp-Phe	0
N-Acetylglycine	Aspartic acid	1	N-Acetylglycine	Aspartic acid	1
Catechol	Benzene-1,2,4-triol	1	Catechol	Benzene-1,2,4-triol	1
Pyrocatechol	Benzene-1,2,4-triol	1	Pyrocatechol	Benzene-1,2,4-triol	1
Salicylic acid	Benzoic acid	1	Salicylic acid	Benzoic acid	1
3-(2-Hydroxyphenyl)propanoic acid	Benzylacetate	0
Tropic acid	Benzylacetate	0
Sinapic acid	Benzylsuccinic acid	0
Ethyldodecanoate	beta-Hydroxymyristic acid	0	Ethyldodecanoate	beta-Hydroxymyristic acid	0
Proline-hydroxyproline	Butabarbital	0	Proline-hydroxyproline	Butabarbital	0
Pro-Hyp	Butabarbital	0	Pro-Hyp	Butabarbital	0
N-Methylglutamic acid	Butyrylglycine	0	N-Methylglutamic acid	Butyrylglycine	0
P-Coumaric acid	Caffeic acid	1	P-Coumaric acid	Caffeic acid	1
Phenylpyruvic acid	Caffeic acid	0	Phenylpyruvic acid	Caffeic acid	0	+oxy, -hydroxyl group
4-Hydroxycinnamic acid	Caffeic acid	1	4-Hydroxycinnamic acid	Caffeic acid	1
M-Coumaric acid	Caffeic acid	0	M-Coumaric acid	Caffeic acid	0
N-Acetylcysteine	Carbocysteine	0	N-Acetylcysteine	Carbocysteine	0
Phloroglucinol	Catechol	1	Phloroglucinol	Catechol	1
Pyrogallol	Catechol	1	Pyrogallol	Catechol	1
P-Coumaric acid	Cinnamic acid	1	P-Coumaric acid	Cinnamic acid	1
Phenylpyruvic acid	Cinnamic acid	0	Phenylpyruvic acid	Cinnamic acid	0	+oxy
4-Hydroxycinnamic acid	Cinnamic acid	1	4-Hydroxycinnamic acid	Cinnamic acid	1
M-Coumaric acid	Cinnamic acid	1	M-Coumaric acid	Cinnamic acid	1
Ethylmalonic acid	Citramalic acid	0	Ethylmalonic acid	Citramalic acid	0
Glutaric acid	Citramalic acid	0	Glutaric acid	Citramalic acid	0
Methylsuccinic acid	Citramalic acid	1	Methylsuccinic acid	Citramalic acid	1
Phenyl-beta-glucopyranoside	CMPF	0	Phenyl-beta-glucopyranoside	CMPF	0
Ferulic acid	Coniferylaldehyde	1	Ferulic acid	Coniferylaldehyde	1
2'-Deoxyguanosine	Cordycepin	0	2'-Deoxyguanosine	Cordycepin	0	shift of NH2, shift of hydroxy group, + oxy group
8-Oxo-7,8-dihydro-2'-deoxyadenosine	Cordycepin	0	8-Oxo-7,8-dihydro-2'-deoxyadenosine	Cordycepin	0
2'-Deoxycytidine-5'-monophosphate	Cytidine-5'-monophosphate	1	2'-Deoxycytidine-5'-monophosphate	Cytidine-5'-monophosphate	1
Lysine	delta-Hydroxylysine	1	Lysine	delta-Hydroxylysine	1
2'-Deoxyguanosine	Deoxyadenosine	0				+oxy, shift of NH2
8-Oxo-7,8-dihydro-2'-deoxyadenosine	Deoxyadenosine	0
Uridine 5'-monophosphate	2'-Deoxyuridine 5'-monophosphate	1	Uridine 5'-monophosphate	2'-Deoxyuridine 5'-monophosphate	1
P-Coumaric acid	Dihydrocoumarin	0	P-Coumaric acid	Dihydrocoumarin	0
Phenylpyruvic acid	Dihydrocoumarin	0	Phenylpyruvic acid	Dihydrocoumarin	0
4-Hydroxycinnamic acid	Dihydrocoumarin	0
M-Coumaric acid	Dihydrocoumarin	0
Norepinephrine	Dopamine	1	Norepinephrine	Dopamine	1
Pyridoxine	Dopamine	0
Epigallocatechin gallate	Epicatechin-3-O-gallate	1	Epigallocatechin gallate	Epicatechin-3-O-gallate	1
Epigallocatechin	Epicatechin	1	Epigallocatechin	Epicatechin	1
Phloretin	Epicatechin	0	Phloretin	Epicatechin	0
Catechin	Epigallocatechin	0	Catechin	Epigallocatechin	0	stereoisomer
Malic acid	Erythronolactone	0	Malic acid	Erythronolactone	0
Ketoisovaleric acid	Ethylmalonic acid	0
Glycitein	Formononetine	0	Glycitein	Formononetine	0	demethylation+methoxylation
Oxaloacetic acid	Fumaric acid	0	Oxaloacetic acid	Fumaric acid	0	+oxy
Oxalacetic acid	Fumaric acid	0	Oxalacetic acid	Fumaric acid	0	+oxy
Gluconic acid	Galactose	0	Gluconic acid	Galactose	0
Gentisinic acid	Gallic acid	0	Gentisinic acid	Gallic acid	0	structural isomer
Homoserine	gamma-Aminobutyric acid	0
N-Methylserine	gamma-Aminobutyric acid	0
Threonine	gamma-Aminobutyric acid	0
Salicylic acid	Gentisinic acid	0	Salicylic acid	Gentisinic acid	0	structural isomer
Glucoerucin	Glucoraphanin	0	Glucoerucin	Glucoraphanin	0	+oxo
Gluconic acid	Glucose	0	Gluconic acid	Glucose	0
Mucic acid	Glucuronic acid	0	Mucic acid	Glucuronic acid	0
Gluconic acid-gamma-lactone	Glucuronic acid	0	Gluconic acid-gamma-lactone	Glucuronic acid	0
N-Acetylalanine	Glutamic acid-2,3,3,4,4-d5	0	N-Acetylalanine	Glutamic acid-2,3,3,4,4-d5	0
3-Hydroxyproline	Glutamic acid-2,3,3,4,4-d5	0	3-Hydroxyproline	Glutamic acid-2,3,3,4,4-d5	0
Hydroxyproline	Glutamic acid-2,3,3,4,4-d5	0	Hydroxyproline	Glutamic acid-2,3,3,4,4-d5	0
N-Acetylalanine	Glutamic acid	0	N-Acetylalanine	Glutamic acid	0
3-Hydroxyproline	Glutamic acid	0	3-Hydroxyproline	Glutamic acid	0
Hydroxyproline	Glutamic acid	0	Hydroxyproline	Glutamic acid	0
Ketoisovaleric acid	Glutaric acid	0
Glyceric acid	Glyceraldehyde	0	Glyceric acid	Glyceraldehyde	0
Methylacetate	Glyceraldehyde	0	Methylacetate	Glyceraldehyde	0
Propionic acid	Glyceraldehyde	0	Propionic acid	Glyceraldehyde	0
2'-Adenylic acid	Guanosine-5'-monophosphate	0	2'-Adenylic acid	Guanosine-5'-monophosphate	0	+oxy, shift of NH2
2'-Deoxyguanosine 3'-monophosphate	Guanosine-5'-monophosphate	0	2'-Deoxyguanosine 3'-monophosphate	Guanosine-5'-monophosphate	0	shift of P
Adenosine-3'-monophosphate	Guanosine-5'-monophosphate	0	Adenosine-3'-monophosphate	Guanosine-5'-monophosphate	0	+oxy, shift of NH2, shift of P
Deoxyguanosine 5'-monophosphate	Guanosine-5'-monophosphate	1	Deoxyguanosine 5'-monophosphate	Guanosine-5'-monophosphate	1
2'-Deoxyguanosine	Guanosine	1	2'-Deoxyguanosine	Guanosine	1
8-Oxo-7,8-dihydro-2'-deoxyadenosine	Guanosine	0	8-Oxo-7,8-dihydro-2'-deoxyadenosine	Guanosine	0
Mandelic acid	Homogentisic acid	0	Mandelic acid	Homogentisic acid	0
Methylgallate	Homogentisic acid	0
P-Anisic acid	Homogentisic acid	0	P-Anisic acid	Homogentisic acid	0
Vanillin	Homogentisic acid	0	Vanillin	Homogentisic acid	0
N,N-Dimethylglycine	Homoserine	0	N,N-Dimethylglycine	Homoserine	0
N-Methylalanine	Homoserine	0
Syringic acid	Homovanillic acid	0
3-(2-Hydroxyphenyl)propanoic acid	Homovanillic acid	0	3-(2-Hydroxyphenyl)propanoic acid	Homovanillic acid	0
Tropic acid	Homovanillic acid	0
3-(2-Hydroxyphenyl)propanoic acid	Hydrocinnamic acid						166.063	1.31382	150.068	1.107583/8.733767	ambiguous, since another entry shows two different retention time values
Tropic acid	Hydrocinnamic acid	0
Purine	Hypoxanthine	0	Purine	Hypoxanthine	0	+oxo
Indole-3-carboxylic acid	Indole-3-carboxaldehyde	1	Indole-3-carboxylic acid	Indole-3-carboxaldehyde	1
4-Hydroxyquinoline	Indole-3-carboxylic acid	0
Quinolone	Indole-3-carboxylic acid	0
Indole-3-propionic acid	Indolelactic acid	1	Indole-3-propionic acid	Indolelactic acid	1
Xanthosine	Inosine	0	Xanthosine	Inosine	0	+oxo
Gluconic acid	Inositol	0	Gluconic acid	Inositol	0
Laricitrin	Isorhamnetin	1	Laricitrin	Isorhamnetin	1
Rutin	Kaempferol-3-O-rutinoside	1	Rutin	Kaempferol-3-O-rutinoside	1
Quercetin	Kaempferol	1	Quercetin	Kaempferol	1
Methylsuccinic acid	Ketoisovaleric acid	0
Stavudine	Kynurenine	0
Oxaloacetic acid	Maleic acid	0	Oxaloacetic acid	Maleic acid	0
Oxalacetic acid	Maleic acid	0	Oxalacetic acid	Maleic acid	0
Methylmalonic acid	Malic acid	0	Methylmalonic acid	Malic acid	0
Succinic acid	Malic acid	1	Succinic acid	Malic acid	1
Tartaric acid	Malic acid	1	Tartaric acid	Malic acid	1
Pyruvic acid	Malonic acid	0
Vanillic acid	Mandelic acid	0
Gluconic acid	Mannose	0	Gluconic acid	Mannose	0
Methioninesulfoxide	Methionine-methyl-13C-methyl-d3	0	Methioninesulfoxide	Methionine-methyl-13C-methyl-d3	0	+oxo
Methioninesulfoxide	Methionine	0	Methioninesulfoxide	Methionine	0	+oxo
Syringic acid	Methyl-4-hydroxy-3-methoxybenzoate	0	Syringic acid	Methyl-4-hydroxy-3-methoxybenzoate	0
3-(2-Hydroxyphenyl)propanoic acid	Methyl-4-hydroxy-3-methoxybenzoate	0
Tropic acid	Methyl-4-hydroxy-3-methoxybenzoate	0
Vanillic acid	Methylgallate	0	Vanillic acid	Methylgallate	0
5-Ketogluconic acid	Mucic acid	0	5-Ketogluconic acid	Mucic acid	0	+hydroxy group, shift of oxo group
Quercetin	Myricetin	1	Quercetin	Myricetin	1
Sarcosine	N,N-Dimethylformamide	0	Sarcosine	N,N-Dimethylformamide	0
N-Methylserine	N,N-Dimethylglycine	0	N-Methylserine	N,N-Dimethylglycine	0
Threonine	N,N-Dimethylglycine	0	Threonine	N,N-Dimethylglycine	0
N6-Isopentenyladenosine	N-2-Hydroxycyclopentyladenosine	0	N6-Isopentenyladenosine	N-2-Hydroxycyclopentyladenosine	0
N-Acetylserine	N-Acetylalanine	0	N-Acetylserine	N-Acetylalanine	0
Proline	N-Acetylalanine	0
O-Acetylserine	N-Acetylalanine	0	O-Acetylserine	N-Acetylalanine	0
3-Hydroxyproline	N-Acetylserine	0	3-Hydroxyproline	N-Acetylserine	0
Hydroxyproline	N-Acetylserine	0	Hydroxyproline	N-Acetylserine	0
Indole-3-propionic acid	N-Cinnamoylglycine	0	Indole-3-propionic acid	N-Cinnamoylglycine	0
N-Methylglutamic acid	N-Isobutyrylglycine	0	N-Methylglutamic acid	N-Isobutyrylglycine	0
N-Methylserine	N-Methylalanine	0
Threonine	N-Methylalanine	0
N-omega-Acetylhistamine	N-Methylhistidine	0	N-omega-Acetylhistamine	N-Methylhistidine	0
N-Methyltyrosine	N-Methylphenylalanine	1	N-Methyltyrosine	N-Methylphenylalanine	1
Valine	N-Methylthreonine	0
alpha-Methylhistidine	N-omega-Acetylhistamine	0	alpha-Methylhistidine	N-omega-Acetylhistamine	0
N6-Methyladenosine	N2-Methylguanosine	0	N6-Methyladenosine	N2-Methylguanosine	0	+oxo, methylgroup at different position
Tyr-Tyr	Nitrendipine	0
P-Coumaric acid	O-Acetylsalicylic acid	0
Phenylpyruvic acid	O-Acetylsalicylic acid	0
4-Hydroxycinnamic acid	O-Acetylsalicylic acid	0	4-Hydroxycinnamic acid	O-Acetylsalicylic acid	0
M-Coumaric acid	O-Acetylsalicylic acid	0	M-Coumaric acid	O-Acetylsalicylic acid	0
Vanillic acid	P-Anisic acid	0	Vanillic acid	P-Anisic acid	0	+hydroxy group, shift of methoxy group
N-Benzyloxycarbonylglycine	Phenylacetylglycine	0
Tyrosine	Phenylalanine	1	Tyrosine	Phenylalanine	1
M-Tyrosine	Phenylalanine	1	M-Tyrosine	Phenylalanine	1
Catechin	Phloretin	0	Catechin	Phloretin	0
Pyrocatechol	Phloroglucinol	0	Pyrocatechol	Phloroglucinol	0
2-Carboxybenzaldehyde	Phthalic acid	1					150.032	2.92953	166.027	1.84403
Carboxybenzaldehyde	Phthalic acid	1	Carboxybenzaldehyde	Phthalic acid	1
Resveratrol	Piceatannol	1	Resveratrol	Piceatannol	1
trans-Resveratrol	Piceatannol	1	trans-Resveratrol	Piceatannol	1
2-Isopropylmalic acid	Pimelic acid	0	2-Isopropylmalic acid	Pimelic acid	0
Thymidine	Porphobilinogen	0
5-Methyl-3-deoxyuridine	Porphobilinogen	0
3-Hydroxyproline	Proline	1					131.058	7.42855	115.063	7.72122	retention time of proline in positive mode: 7.38355/7.67205
Hydroxyproline	Proline	1					131.058	7.6927	115.063	7.72122
2'-Deoxyuridine	Pseudouridine	0	2'-Deoxyuridine	Pseudouridine	0
Gluconic acid	Psicose	0	Gluconic acid	Psicose	0
2-Isopropylmalic acid	Quinic acid	0	2-Isopropylmalic acid	Quinic acid	0
Serine	Sarcosine	0	Serine	Sarcosine	0
Gluconic acid	Sorbose	0	Gluconic acid	Sorbose	0
3-(4-Hydroxyphenyl)lactic acid	Syringic acid	0
Methyl-4-hydroxy-3-methoxy-benzoate	Syringic acid	0	Methyl-4-hydroxy-3-methoxy-benzoate	Syringic acid	0
Gluconic acid	Tagatose	0	Gluconic acid	Tagatose	0
2'-Deoxyuridine	Uridine	1	2'-Deoxyuridine	Uridine	1
Vanillin	Vanillic acid	1	Vanillin	Vanillic acid	1
2'-Deoxyguanosine	2'-Deoxyadenosine	0				shift of NH2, + oxy
8-Oxo-7,8-dihydro-2'-deoxyadenosine	2'-Deoxyadenosine	0
3-(4-Hydroxyphenyl)lactic acid	3-(2-Hydroxyphenyl)propanoic acid	0	3-(4-Hydroxyphenyl)lactic acid	3-(2-Hydroxyphenyl)propanoic acid	0	structural isomer
Methyl-4-hydroxy-3-methoxy-benzoate	3-(2-Hydroxyphenyl)propanoic acid	0
Tropic acid	3-(4-Hydroxyphenyl)lactic acid	0	Tropic acid	3-(4-Hydroxyphenyl)lactic acid	0
O-Acetylserine	3-Hydroxyproline	0
Jasmonic acid	4-Hexylresorcinol	0	Jasmonic acid	4-Hexylresorcinol	0
Glucobrassicin	4-Hydroxyglucobrassicin	1	Glucobrassicin	4-Hydroxyglucobrassicin	1
Indole-3-acetic acid	5-Hydroxyindole-3-acetic acid	1	Indole-3-acetic acid	5-Hydroxyindole-3-acetic acid	1
Gluconic acid-gamma-lactone	5-Ketogluconic acid	0	Gluconic acid-gamma-lactone	5-Ketogluconic acid	0
Epigallocatechin gallate	Epicatechin-3-o-gallate	1	Epigallocatechin gallate	Epicatechin-3-o-gallate	1
Epigallocatechin gallate	Epicatechingallate	1	Epigallocatechin gallate	Epicatechingallate	1
Myoinositol	Gluconic acid	0	Myoinositol	Gluconic acid	0
O-Acetylserine	Hydroxyproline	0
Tropic acid	Methyl-4-hydroxy-3-methoxy-benzoate	0
Pyrogallol	Pyrocatechol	1	Pyrogallol	Pyrocatechol	1
	observations (as identified as positive hydroxylation)	461		observations (positives)	329
	TP	111		TP	102
	FP	350		FP	227
	FN	0		FN (positives outside data)	9
	TN	347734		TN	347857
	sensitivity/TPR	1		sensitivity/TPR	0.918919
	specificity/TNR	0.998994		specificity/TNR	0.999348
	FPR	0.0010055		FPR	0.000652141
	FDR	0.759219		FDR	0.68997
	accuracy	0.998995		accuracy	0.999322
	sensitivity	TPR=TP/P=TP/(TP+FN)=1-FNR
	specificity	TNR=TN/N=TN/(TN+FP)=1-FPR
	true negatives	TN=total comparisons – (TP+FP)
	false positive rate	FPR=FP/(FP+TN)
	false discovery rate	FDR=FP/(FP+TP)
	accuracy	ACC=(TP+TN)/(TP+TN+FP+FN)
	total comparisons	348195
	Choose(n, 2) + n
	n metabolites = 834

## Sheet: monosaccharide_pos
metaboolite1	metabolite2	+monosaccharide	metabolite1_rt	metabolite2_rt	+monosaccharide
2'-O-Methyl-5-methyluridine	1-Acetylimidazole	0	2'-O-Methyl-5-methyluridine	1-Acetylimidazole	0
Adenine	1-Methylguanosine	0	Adenine	1-Methylguanosine	0	shift of NH2, +methyl +pentose
Adenine	2'-O-Methylguanosine	0	Adenine	2'-O-Methylguanosine	0	shifft of NH2, +oxy, +pentose
Purine	2'-O-Methylinosine	0	Purine	2'-O-Methylinosine	0	+ oxy, + pentose
Glucose	2-alpha-Mannobiose	0	Glucose	2-alpha-Mannobiose	0	structural isomers
Raffinose	2-alpha-Mannobiose	0				structural isomers
Adenine	3'-O-Methylguanosine	0	Adenine	3'-O-Methylguanosine	0	+ oxy, + pentose
Muramic acid	Alanine-2,3,3,3-d4	0	Muramic acid	Alanine-2,3,3,3-d4	0
Vitexin	4,5,7-Trihydroxyisoflavone	0	Vitexin	4,5,7-Trihydroxyisoflavone	0	Flavon → isoflavone
Cytosine	5-Hydroxymethylcytidine	0	Cytosine	5-Hydroxymethylcytidine	0	+hydroxymetyl +pentose
Uracil	5-Methoxyuridine	0	Uracil	5-Methoxyuridine	0	+methoxy +pentose
N2-Methylguanosine	Adenine	0	N2-Methylguanosine	Adenine	0	+oxy+methyl+pentose
Muramic acid	Alanine	0	Muramic acid	Alanine	0
Oxytetracycline	Amlexanox	0	Oxytetracycline	Amlexanox	0
Muramic acid	beta-Alanine	0	Muramic acid	beta-Alanine	0
gamma-Glutamylglutamine	Creatinine	0	gamma-Glutamylglutamine	Creatinine	0
Glu-Gln	Creatinine	0	Glu-Gln	Creatinine	0
H-gamma-glutamyl-glutamine	Creatinine	0	H-gamma-glutamyl-glutamine	Creatinine	0
SkF 83566	Cysteic acid	0
Trehalose-6-phosphate	Glucose-1-phosphate	0				shift of P
Trehalose-6-phosphate	Glucose-6-phosphate	0	Trehalose-6-phosphate	Glucose-1-phosphate	0	shift of P
N-Acetylneuraminic acid	Glutamic acid	0	N-Acetylneuraminic acid	Glutamic acid	0
Vitexin	Kaempferol-3-O-rutinoside	0	Vitexin	Kaempferol-3-O-rutinoside	0	+pentose, 8-C glycosyl, 3-O-glycosyl
Quercetin-3-ramnoside	Kaempferol	0	Quercetin-3-ramnoside	Kaempferol	0	+hydroxy+pentose
Muramic acid	Lactamide	0	Muramic acid	Lactamide	0
Glucose	Maltose	1	Glucose	Maltose	1
Raffinose	Maltose	1	Raffinose	Maltose	1
Muramic acid	Methylglycinate	0	Muramic acid	Methylglycinate	0
Sarcosine	Muramic acid	0	Sarcosine	Muramic acid	0
N-Acetylserine	N-Acetylneuraminic acid	0	N-Acetylserine	N-Acetylneuraminic acid	0
N-Methylaspartic acid	N-Acetylneuraminic acid	0	N-Methylaspartic acid	N-Acetylneuraminic acid	0
O-Acetylserine	N-Acetylneuraminic acid	0	O-Acetylserine	N-Acetylneuraminic acid	0
O-Acetyl-L-serine	N-Acetylneuraminic acid	0	O-Acetyl-L-serine	N-Acetylneuraminic acid	0
Topiramate	N-Formylmethionine	0
trans-Piceid	Resveratrol	1	trans-Piceid	Resveratrol	1
Quercetin-3-ramnoside	Rutin	1	Quercetin-3-ramnoside	Rutin	1
Chlorogenic acid	Scopoletin	0	Chlorogenic acid	Scopoletin	0
Kaempferol 3-O-rutinoside	Vitexin	0	Kaempferol 3-O-rutinoside	Vitexin	0	+pentose, 8-C glycosyl, 3-O-glycosyl
Isomaltose	Glucose	1	Isomaltose	Glucose	1
Sucrose	Glucose	1	Sucrose	Glucose	1
Raffinose	Isomaltose	0	Raffinose	Isomaltose	0	structural isomer
Sucrose	Raffinose	1	Sucrose	Raffinose	1
	observations (positives)	42		observations (positives)	38
	TP	7		TP	7
	FP	35		FP	31
	FN	0		FN (positives outside data)	0
	TN	504468		TN	504472
	sensitivity/TPR	1		sensitivity/TPR	1
	specificity/TNR	0.999931		specificity/TNR	0.999939
	FPR	6.93752e-05		FPR	6.14466e-05
	FDR	0.833333		FDR	0.815789
	accuracy	0.999931		accuracy	0.999939
	sensitivity	TPR=TP/P=TP/(TP+FN)=1-FNR
	specificity	TNR=TN/N=TN/(TN+FP)=1-FPR
	true negatives	TN=total comparisons – (TP+FP)
	false positive rate	FPR=FP/(FP+TN)
	false discovery rate	FDR=FP/(FP+TP)
	accuracy	ACC=(TP+TN)/(TP+TN+FP+FN)
	total comparisons	504510
	Choose(n, 2) + n
	n metabolites = 1004

## Sheet: monosaccharide_neg
metaboolite1	metabolite2	+monosaccharide	metabolite1_rt	metabolite2_rt	+monosaccharide
Adenine	1-Methylguanosine	0	Adenine	1-Methylguanosine	0	shift of NH2, +methyl +pentose
Adenine	2'-O-Methylguanosine	0	Adenine	2'-O-Methylguanosine	0	shifft of NH2, +oxy, +pentose
Purine	2'-O-Methylinosine	0	Purine	2'-O-Methylinosine	0	+ oxy, + pentose
Galactose	2-alpha-Mannobiose	0	Galactose	2-alpha-Mannobiose	0	stereoisomer
Glucose	2-alpha-Mannobiose	0	Glucose	2-alpha-Mannobiose	0	stereoisomer
Inositol	2-alpha-Mannobiose	0	Inositol	2-alpha-Mannobiose	0
Maltotriose	2-alpha-Mannobiose	0	Maltotriose	2-alpha-Mannobiose	0	stereoisomer
Mannose	2-alpha-Mannobiose	1	Mannose	2-alpha-Mannobiose	1
Melezitose	2-alpha-Mannobiose	0	Melezitose	2-alpha-Mannobiose	0
Psicose	2-alpha-Mannobiose	0	Psicose	2-alpha-Mannobiose	0	stereoisomer
Raffinose	2-alpha-Mannobiose	0	Raffinose	2-alpha-Mannobiose	0	stereoisomer
Sorbose	2-alpha-Mannobiose	0	Sorbose	2-alpha-Mannobiose	0	stereoisomer
Tagatose	2-alpha-Mannobiose	0	Tagatose	2-alpha-Mannobiose	0	stereoisomer
Myoinositol	2-alpha-Mannobiose	0	Myoinositol	2-alpha-Mannobiose	0
Adenine	3'-O-Methylguanosine	0	Adenine	3'-O-Methylguanosine	0	+ oxy, + pentose
Salicin	3-(Hydroxymethyl)phenol	0	Salicin	3-(Hydroxymethyl)phenol	0
Picrotin	3-Isochromanone	0
Salicin	3-Methylcatechol	0	Salicin	3-Methylcatechol	0
Vitexin	4,5,7-Trihydroxyisoflavone	0	Vitexin	4,5,7-Trihydroxyisoflavone	0	Flavon → isoflavone
Salicin	4-Methylcatechol	0	Salicin	4-Methylcatechol	0
Cytosine	5-Hydroxymethylcytidine	0	Cytosine	5-Hydroxymethylcytidine	0	+hydroxymetyl +pentose
Uracil	5-Hydroxymethyluridine	0	Uracil	5-Hydroxymethyluridine	0
Uracil	5-Methoxyuridine	0	Uracil	5-Methoxyuridine	0	+methoxy +pentose
N2-Methylguanosine	Adenine	0	N2-Methylguanosine	Adenine	0	+oxy+methyl+pentose
Muramic acid	Alanine-2,3,3,3-d4	0	Muramic acid	Alanine-2,3,3,3-d4	0
Muramic acid	Alanine	0	Muramic acid	Alanine	0
Catechol	Arbutin	0	Catechol	Arbutin	0
Pyrocatechol	Arbutin	0	Pyrocatechol	Arbutin	0
Galactose	Cellobiose	0	Galactose	Cellobiose	0	stereoisomer
Glucose	Cellobiose	1	Glucose	Cellobiose	1
Inositol	Cellobiose	0	Inositol	Cellobiose	0
Maltotriose	Cellobiose	0	Maltotriose	Cellobiose	0
Mannose	Cellobiose	1	Mannose	Cellobiose	1
Melezitose	Cellobiose	0	Melezitose	Cellobiose	0
Psicose	Cellobiose	0	Psicose	Cellobiose	0
Raffinose	Cellobiose	0	Raffinose	Cellobiose	0
Sorbose	Cellobiose	0	Sorbose	Cellobiose	0
Tagatose	Cellobiose	0	Tagatose	Cellobiose	0
Myoinositol	Cellobiose	0	Myoinositol	Cellobiose	0
Scopoletin	Chlorogenic acid	0	Scopoletin	Chlorogenic acid	0
Picrotin	Cinnamic acid	0
gamma-Glutamylglutamine	Creatinine	0	gamma-Glutamylglutamine	Creatinine	0
Glu-Gln	Creatinine	0	Glu-Gln	Creatinine	0
gamma-Glu-Glu	Creatinine	0	gamma-Glu-Glu	Creatinine	0
SkF 83566	Cysteic Acid	0
Picrotin	Dihydrocoumarin	0
Phosphoric acid	Fructose-1-phosphate	1
Trehalose-6-Phosphate	Fructose-1-phosphate	0	Trehalose-6-Phosphate	Fructose-1-phosphate	0
Trehalose-6-phosphate	Fructose-1-phosphate	0	Trehalose-6-phosphate	Fructose-1-phosphate	0
Isomaltose	Galactose	0	Isomaltose	Galactose	0
Lactose	Galactose	1	Lactose	Galactose	1
Lactulose	Galactose	1	Lactulose	Galactose	1
Maltose	Galactose	0	Maltose	Galactose	0
Melibiose	Galactose	1	Melibiose	Galactose	1
Palatinose	Galactose	0	Palatinose	Galactose	0
Sucrose	Galactose	0	Sucrose	Galactose	0
Trehalose	Galactose	0	Trehalose	Galactose	0
Phosphoric acid	Glucose-1-phosphate	1					97.9769	9.625983/9.9804	260.03	9.29085/9.6081/9.617416
Trehalose-6-Phosphate	Glucose-1-phosphate	0	Trehalose-6-Phosphate	Glucose-1-phosphate	0	shift of P
Trehalose-6-phosphate	Glucose-1-phosphate	0	Trehalose-6-phosphate	Glucose-1-phosphate	0	shift of P
Phosphoric acid	Glucose-6-phosphate	1					97.9769	9.625983/9.9804	260.03	9.44475/9.779516	Retention time of Glucose-6-phosphate in positive mode: 9.858417
Trehalose-6-Phosphate	Glucose-6-phosphate	1	Trehalose-6-Phosphate	Glucose-6-phosphate	1
Trehalose-6-phosphate	Glucose-6-phosphate						422.083	9.70775/10.05025	260.03	9.44475/9.779516	Retention time of Glucose-6-phosphate in positive mode: 9.858417
Isomaltose	Glucose	1	Isomaltose	Glucose	1
Lactose	Glucose	1	Lactose	Glucose	1
Lactulose	Glucose	0	Lactulose	Glucose	0
Maltose	Glucose	1	Maltose	Glucose	1
Melibiose	Glucose	1	Melibiose	Glucose	1
Palatinose	Glucose	1	Palatinose	Glucose	1
Sucrose	Glucose	1	Sucrose	Glucose	1
Trehalose	Glucose	1	Trehalose	Glucose	1
N-Acetylneuraminic acid	Glutamic acid-2,3,3,4,4-d5	0	N-Acetylneuraminic acid	Glutamic acid-2,3,3,4,4-d5	0
N-Acetylneuraminic acid	Glutamic acid	0	N-Acetylneuraminic acid	Glutamic acid	0
Quercetin	Hyperoside	1	Quercetin	Hyperoside	1
Isomaltose	Inositol	0	Isomaltose	Inositol	0
Lactose	Inositol	0	Lactose	Inositol	0
Lactulose	Inositol	0	Lactulose	Inositol	0
Maltose	Inositol	0	Maltose	Inositol	0
Melibiose	Inositol	0	Melibiose	Inositol	0
Palatinose	Inositol	0	Palatinose	Inositol	0
Sucrose	Inositol	0	Sucrose	Inositol	0
Trehalose	Inositol	0	Trehalose	Inositol	0
Maltotriose	Isomaltose	0	Maltotriose	Isomaltose	0
Mannose	Isomaltose	0	Mannose	Isomaltose	0
Melezitose	Isomaltose	0	Melezitose	Isomaltose	0
Psicose	Isomaltose	0	Psicose	Isomaltose	0
Raffinose	Isomaltose	0	Raffinose	Isomaltose	0	structural isomer
Sorbose	Isomaltose	0	Sorbose	Isomaltose	0
Tagatose	Isomaltose	0	Tagatose	Isomaltose	0
Myoinositol	Isomaltose	0	Myoinositol	Isomaltose	0
Quercetin	Isoquercetrin	1	Quercetin	Isoquercetrin	1
Isorhamnetin	Isorhamnetin-3-glucoside	1	Isorhamnetin	Isorhamnetin-3-glucoside	1
Vitexin	Kaempferol-3-O-rutinoside	0	Vitexin	Kaempferol-3-O-rutinoside	0	+pentose, 8-C glycosyl, 3-O-glycosyl
Mannitol	Lactitol	0	Mannitol	Lactitol	0
Sorbitol	Lactitol	1	Sorbitol	Lactitol	1
Maltotriose	Lactose	0	Maltotriose	Lactose	0
Mannose	Lactose	0	Mannose	Lactose	0
Melezitose	Lactose	0	Melezitose	Lactose	0
Psicose	Lactose	0	Psicose	Lactose	0
Raffinose	Lactose	1	Raffinose	Lactose	1
Sorbose	Lactose	0	Sorbose	Lactose	0	stereoisomer
Tagatose	Lactose	0	Tagatose	Lactose	0	stereoisomer
Myoinositol	Lactose	0	Myoinositol	Lactose	0
Maltotriose	Lactulose	0	Maltotriose	Lactulose	0
Mannose	Lactulose	0	Mannose	Lactulose	0
Melezitose	Lactulose	0	Melezitose	Lactulose	0
Psicose	Lactulose	0	Psicose	Lactulose	0
Raffinose	Lactulose	0	Raffinose	Lactulose	0
Sorbose	Lactulose	0	Sorbose	Lactulose	0
Tagatose	Lactulose	0	Tagatose	Lactulose	0
Myoinositol	Lactulose	0	Myoinositol	Lactulose	0
Maltotriose	Maltose	1	Maltotriose	Maltose	1
Mannose	Maltose	0	Mannose	Maltose	0
Melezitose	Maltose	0	Melezitose	Maltose	0
Psicose	Maltose	0	Psicose	Maltose	0
Raffinose	Maltose	1	Raffinose	Maltose	1
Sorbose	Maltose	0	Sorbose	Maltose	0
Tagatose	Maltose	0	Tagatose	Maltose	0
Myoinositol	Maltose	0	Myoinositol	Maltose	0
Melibiose	Maltotriose	0	Melibiose	Maltotriose	0
Palatinose	Maltotriose	0	Palatinose	Maltotriose	0
Sucrose	Maltotriose	0	Sucrose	Maltotriose	0
Trehalose	Maltotriose	0	Trehalose	Maltotriose	0
Melibiose	Mannose	0	Melibiose	Mannose	0
Palatinose	Mannose	0	Palatinose	Mannose	0
Sucrose	Mannose	0	Sucrose	Mannose	0
Trehalose	Mannose	0	Trehalose	Mannose	0
Melibiose	Melezitose	0	Melibiose	Melezitose	0
Palatinose	Melezitose	0	Palatinose	Melezitose	0
Sucrose	Melezitose	1	Sucrose	Melezitose	1
Trehalose	Melezitose	0	Trehalose	Melezitose	0
Psicose	Melibiose	0	Psicose	Melibiose	0
Raffinose	Melibiose	1	Raffinose	Melibiose	1
Sorbose	Melibiose	0	Sorbose	Melibiose	0
Tagatose	Melibiose	0	Tagatose	Melibiose	0
Myoinositol	Melibiose	0	Myoinositol	Melibiose	0
Sarcosine	Muramic acid	0	Sarcosine	Muramic acid	0
N-Acetylserine	N-Acetylneuraminic acid	0	N-Acetylserine	N-Acetylneuraminic acid	0
O-Acetylserine	N-Acetylneuraminic acid	0	O-Acetylserine	N-Acetylneuraminic acid	0
Topiramate	N-Formylmethionine	0
Amlexanox	Oxytetracycline	0	Amlexanox	Oxytetracycline	0
Psicose	Palatinose	0	Psicose	Palatinose	0
Raffinose	Palatinose	1	Raffinose	Palatinose	1
Sorbose	Palatinose	0	Sorbose	Palatinose	0
Tagatose	Palatinose	0	Tagatose	Palatinose	0
Myoinositol	Palatinose	0	Myoinositol	Palatinose	0
Resveratrol	Piceid	1	Resveratrol	Piceid	1
trans-Resveratrol	Piceid	1	trans-Resveratrol	Piceid	1
Sucrose	Psicose	0	Sucrose	Psicose	0
Trehalose	Psicose	0	Trehalose	Psicose	0
Sucrose	Raffinose	1	Sucrose	Raffinose	1
Trehalose	Raffinose	0	Trehalose	Raffinose	0
Salicylic alcohol	Salicin	1	Salicylic alcohol	Salicin	1
Orcinol	Salicin	0	Orcinol	Salicin	0
Sucrose	Sorbose	0	Sucrose	Sorbose	0
Trehalose	Sorbose	0	Trehalose	Sorbose	0
Tagatose	Sucrose	0	Tagatose	Sucrose	0
Myoinositol	Sucrose	0	Myoinositol	Sucrose	0
Trehalose	Tagatose	0	Trehalose	Tagatose	0
Myoinositol	Trehalose	0	Myoinositol	Trehalose	0
	observations (as identified as positive hydroxylation)	159		observations (positives)	151
	TP	31		TP	28
	FP	128		FP	123
	FN	0		FN (positives outside data)	3
	TN	348036		TN	348041
	sensitivity/TPR	1		sensitivity/TPR	0.903226
	specificity/TNR	0.999632		specificity/TNR	0.999647
	FPR	0.000367643		FPR	0.000353282
	FDR	0.805031		FDR	0.81457
	accuracy	0.999632		accuracy	0.999638
	sensitivity	TPR=TP/P=TP/(TP+FN)=1-FNR
	specificity	TNR=TN/N=TN/(TN+FP)=1-FPR
	true negatives	TN=total comparisons – (TP+FP)
	false positive rate	FPR=FP/(FP+TN)
	false discovery rate	FDR=FP/(FP+TP)
	accuracy	ACC=(TP+TN)/(TP+TN+FP+FN)
	total comparisons	348195
	Choose(n, 2) + n
	n metabolites = 834

## Sheet: rhamnose_pos
metaboolite1	metabolite2	+rhamnose	metabolite1_rt	metabolite2_rt	+rhamnose
5'-O-Methylthymidine	1-Acetylimidazole	0	5'-O-Methylthymidine	1-Acetylimidazole	0
Adenine	1-Methyladenosine	0	Adenine	1-Methyladenosine	0	+methyl+ribofuranose
Guanine	1-Methylguanosine	0				+methyl+ribofuranose
Uracil	1-Methylpseudouridine	0	Uracil	1-Methylpseudouridine	0	+methyl+ribofuranose
Adenine	2'-O-Methyladenosine	0
Cytosine	2'-O-Methylcytidine	0
Guanine	2'-O-Methylguanosine	0
Hypoxanthine	2'-O-Methylinosine	0				+ribose
Uracil	2'-O-Methyluridine	0				+ribose
Cytosine	3'-O-Methylcytidine	0				+methylated ribose
Guanine	3'-O-Methylguanosine	0				+methylated ribose
Uracil	3'-O-Methyluridine	0	Uracil	3'-O-Methyluridine	0	+methylated ribose
Cytosine	3-Methylcytidine	0	Cytosine	3-Methylcytidine	0	+methyl+ribofuranose
Cytosine	5-Methylcytidine	0	Cytosine	5-Methylcytidine	0	+methyl+ribofuranose
Uracil	5-Methyluridine	0	Uracil	5-Methyluridine	0	+methyl+ribofuranose
S-Adenosyl-homocysteine	6-Hydroxyflavone	0	S-Adenosyl-homocysteine	6-Hydroxyflavone	0
Adenine	6-Methyladenosine	0				+methyl+ribofuranose
N-Acetylglucosamine	Acetohydroxamic acid	0	N-Acetylglucosamine	Acetohydroxamic acid	0
N-Acetylmannosamine	Acetohydroxamic acid	0	N-Acetylmannosamine	Acetohydroxamic acid	0
N6-Methyladenosine	Adenine	0				+methyl+ribofuranose
Nicotine	Bestatin	0	Nicotine	Bestatin	0
Memantine	Bisoprolol	0
Ramipril	Doxylamine	0
Methamphetamine	Esmolol	0
Phentermine	Esmolol	0
Miglitol	Ethanolamine	0	Miglitol	Ethanolamine	0	+piperidin
Tacrine	Formoterol	0	Tacrine	Formoterol	0
Pitavastatin	gamma-Glutamylglutamine	0
Pitavastatin	Glu-Gln	0
N-Acetylglucosamine	Glycine	0
N-Acetylmannosamine	Glycine	0
N2-Methylguanosine	Guanine	0				+methyl+ribofuranose
Myricetin	Hyperoside	0	Myricetin	Hyperoside	0	-hydroxy+galactose
Rutin	Hyperoside	0	Rutin	Hyperoside	0	Rutin = quercetin + rutinose=rhamnose+glucose, hyperosde is 3-O-galactose of quercetin
Myricetin	Isoquercetrin	0	Myricetin	Isoquercetrin	0	-hydroxy +glucose
Rutin	Isoquercetrin	0	Rutin	Isoquercetrin	0	shift of hydroxyl
Isorhamnetin-3-glucoside	Isorhamnetin-3-O-rutinoside	1	Isorhamnetin-3-glucoside	Isorhamnetin-3-O-rutinoside	1
Quercetin-3-ramnoside	Kaempferol-3-O-rutinoside	0	Quercetin-3-ramnoside	Kaempferol-3-O-rutinoside	0	+hydroxy+pentose
Vitexin	Kaempferol	0	Vitexin	Kaempferol	0	+pentose, not O-glycosylated
Nobiletin	Liquiritigenin	0				2x hydroxyl group → COH3, + 4COH3
Serine	Muramic acid	0
Pantothenic acid	N,N-Dimethylformamide	0	Pantothenic acid	N,N-Dimethylformamide	0
Troxipide	Nornicotine	0
p-Coumaric acid	Picrotin	0
H-gamma-glutamyl-glutamine	Pitavastatin	0
3-Methyluridine	Uracil	0				+methyl+ribofuranose
Quercetin-3-ramnoside	Kaempferol 3-O-rutinoside	0	Quercetin-3-ramnoside	Kaempferol 3-O-rutinoside	0	+hydroxy+pentose
	observations (positives)	47		observations (positives)	22
	TP	1		TP	1
	FP	46		FP	21
	FN	0		FN (positives outside data)	0
	TN	504463		TN	504488
	sensitivity/TPR	1		sensitivity/TPR	1
	specificity/TNR	0.999909		specificity/TNR	0.999958
	FPR	9.11778e-05		FPR	4.16246e-05
	FDR	0.978723		FDR	0.954545
	accuracy	0.999909		accuracy	0.999958
	sensitivity	TPR=TP/P=TP/(TP+FN)=1-FNR
	specificity	TNR=TN/N=TN/(TN+FP)=1-FPR
	true negatives	TN=total comparisons – (TP+FP)
	false positive rate	FPR=FP/(FP+TN)
	false discovery rate	FDR=FP/(FP+TP)
	accuracy	ACC=(TP+TN)/(TP+TN+FP+FN)
	total comparisons	504510
	Choose(n, 2) + n
	n metabolites = 1004

## Sheet: rhamnose_neg
metaboolite1	metabolite2	+rhamnose	metabolite1_rt	metabolite2_rt	+rhamnose
Adenine	1-Methyladenosine	0	Adenine	1-Methyladenosine	0	+methyl+ribofuranose
Guanine	1-Methylguanosine	0				+methyl+ribofuranose
Uracil	1-Methylpseudouridine	0	Uracil	1-Methylpseudouridine	0	+methyl+ribofuranose
Adenine	2'-O-Methyladenosine	0
Cytosine	2'-O-Methylcytidine	0
Guanine	2'-O-Methylguanosine	0
Hypoxanthine	2'-O-Methylinosine	0				+ribose
Uracil	2'-O-Methyluridine	0				+ribose
Gluconic acid	2-alpha-Mannobiose	0
Picrotin	2-Hydroxycinnamic acid	0
Adenine	2-O-Methyladenosine	0
Cytosine	3'-O-Methylcytidine	0				+methylated ribose
Guanine	3'-O-Methylguanosine	0				+methylated ribose
Uracil	3'-O-Methyluridine	0				+methylated ribose
Uracil	3-Methyluridine	0				+methyl+ribofuranose
Arbutin	4-Hydroxy-6-methyl-2-pyrone	0	Arbutin	4-Hydroxy-6-methyl-2-pyrone	0
Cytosine	5-Methylcytidine	0	Cytosine	5-Methylcytidine	0	+methyl+ribofuranose
Uracil	5-Methyluridine	0	Uracil	5-Methyluridine	0	+methyl+ribofuranose
S-Adenosyl-homocysteine	6-Hydroxyflavone	0	S-Adenosyl-homocysteine	6-Hydroxyflavone	0
N6-Methyladenosine	Adenine	0				+methyl+ribofuranose
Benzene-1,2,4-triol	Arbutin	0	Benzene-1,2,4-triol	Arbutin	0
Phloroglucinol	Arbutin	0
Pyrogallol	Arbutin	0	Pyrogallol	Arbutin	0
Phenyl-beta-glucopyranoside	Catechol	0	Phenyl-beta-glucopyranoside	Catechol	0
Gluconic acid	Cellobiose	0
N-Acetylaspartylglutamic acid	Dihydroorotic acid	0	N-Acetylaspartylglutamic acid	Dihydroorotic acid	0
Glycolic acid	Ethyl-beta-glucuronide	0	Glycolic acid	Ethyl-beta-glucuronide	0
Pitavastatin	gamma-Glutamylglutamine	0
Pitavastatin	Glu-Gln	0
N2-Methylguanosine	Guanine	0
Myricetin	Hyperoside	0	Myricetin	Hyperoside	0	-hydroxy+galactose
Rutin	Hyperoside	0	Rutin	Hyperoside	0	Rutin = quercetin + rutinose=rhamnose+glucose, hyperosde is 3-O-galactose of quercetin
Gluconic acid	Isomaltose	0
Myricetin	Isoquercetrin	0	Myricetin	Isoquercetrin	0	-hydroxy +glucose
Rutin	Isoquercetrin	0	Rutin	Isoquercetrin	0	shift of hydroxyl
Isorhamnetin-3-O-rutinoside	Isorhamnetin-3-glucoside	1	Isorhamnetin-3-O-rutinoside	Isorhamnetin-3-glucoside	1
Laricitrin	Isorhamnetin-3-glucoside	0	Laricitrin	Isorhamnetin-3-glucoside	0
Vitexin	Kaempferol	0	Vitexin	Kaempferol	0	+pentose, not O-glycosylated
Gluconic acid	Lactose	0
Gluconic acid	Lactulose	0
Gluconic acid	Maltose	0
Gluconic acid	Melibiose	0
Serine	Muramic acid	0
Pantothenic acid	N,N-Dimethylformamide	0
Picrotin	P-Coumaric acid	0
Gluconic acid	Palatinose	0
Pyrocatechol	Phenyl-beta-glucopyranoside	0	Pyrocatechol	Phenyl-beta-glucopyranoside	0
Picrotin	Phenylpyruvic acid	0
Piceid	Piceatannol	0	Piceid	Piceatannol	0
4-Hydroxycinnamic acid	Picrotin	0
M-Coumaric acid	Picrotin	0
gamma-Glu-Glu	Pitavastatin	0
Gluconic acid	Sucrose	0
Gluconic acid	Trehalose	0
	observations (as identified as positive hydroxylation)	54		observations (positives)	20
	TP	1		TP	1
	FP	53		FP	19
	FN	0		FN (positives outside data)	0
	TN	348141		TN	348175
	sensitivity/TPR	1		sensitivity/TPR	1
	specificity/TNR	0.999848		specificity/TNR	0.999945
	FPR	0.000152214		FPR	5.45673e-05
	FDR	0.981481		FDR	0.95
	accuracy	0.999848		accuracy	0.999945
	sensitivity	TPR=TP/P=TP/(TP+FN)=1-FNR
	specificity	TNR=TN/N=TN/(TN+FP)=1-FPR
	true negatives	TN=total comparisons – (TP+FP)
	false positive rate	FPR=FP/(FP+TN)
	false discovery rate	FDR=FP/(FP+TP)
	accuracy	ACC=(TP+TN)/(TP+TN+FP+FN)
	total comparisons	348195
	Choose(n, 2) + n
	n metabolites = 834
